# Supplementary material
Source: publisher site journal article supplement (https://www.spandidos-publications.com/7550/downloadSupplementary)

Figure S1. Continued.

Fastp report

**Summary**

General

|                               |                                                                                              |
|-------------------------------|----------------------------------------------------------------------------------------------|
| fastp version:                | 0.21.0 ( <a href="https://github.com/OpenGene/fastp">https://github.com/OpenGene/fastp</a> ) |
| sequencing:                   | paired end (150 cycles + 150 cycles)                                                         |
| mean length before filtering: | 150bp, 150bp                                                                                 |
| mean length after filtering:  | 149bp, 149bp                                                                                 |
| duplication rate:             | 17.419749%                                                                                   |
| Insert size peak:             | 248                                                                                          |
| Detected read2 adapter:       | AGATCGGAAGAGCGTCGTGTAGGGAAAGAGTGT                                                            |

Before filtering

|              |                           |
|--------------|---------------------------|
| total reads: | 5.355036 M                |
| total bases: | 803.255400 M              |
| Q20 bases:   | 777.152110 M (96.750313%) |
| Q30 bases:   | 737.277038 M (91.786129%) |
| GC content:  | 43.008339%                |

After filtering

|              |                           |
|--------------|---------------------------|
| total reads: | 5.296722 M                |
| total bases: | 792.941293 M              |
| Q20 bases:   | 769.622446 M (97.059196%) |
| Q30 bases:   | 730.985294 M (92.186559%) |
| GC content:  | 42.957271%                |

Filtering result

|                         |                         |
|-------------------------|-------------------------|
| reads passed filters:   | 5.296722 M (98.911044%) |
| reads with low quality: | 57.868000 K (1.080628%) |
| reads with too many N:  | 172 (0.003212%)         |
| reads too short:        | 274 (0.005117%)         |

**Adapters**

Adapter or bad ligation of read1

Input has little adapter percentage (~0.185076%), probably it's trimmed before.

| Sequence                        | Occurrences |
|---------------------------------|-------------|
| A                               | 1892        |
| AG                              | 1802        |
| AGA                             | 1670        |
| AGAT                            | 1578        |
| AGATC                           | 1599        |
| AGATCG                          | 1437        |
| AGATCGG                         | 1349        |
| AGATCGGA                        | 1267        |
| AGATCGGAA                       | 1180        |
| AGATCGGAAG                      | 1130        |
| AGATCGGAAGA                     | 1170        |
| AGATCGGAAGAG                    | 1153        |
| AGATCGGAAGAGC                   | 1015        |
| AGATCGGAAGAGCA                  | 947         |
| AGATCGGAAGAGCAC                 | 916         |
| AGATCGGAAGAGCACAC               | 823         |
| AGATCGGAAGAGCACAC               | 856         |
| AGATCGGAAGAGCACACG              | 738         |
| AGATCGGAAGAGCACACGT             | 678         |
| AGATCGGAAGAGCACACGTC            | 653         |
| AGATCGGAAGAGCACACGTCT           | 649         |
| AGATCGGAAGAGCACACGTCTG          | 611         |
| AGATCGGAAGAGCACACGTCTGA         | 546         |
| AGATCGGAAGAGCACACGTCTGAA        | 632         |
| AGATCGGAAGAGCACACGTCTGAAC       | 546         |
| AGATCGGAAGAGCACACGTCTGAACT      | 489         |
| AGATCGGAAGAGCACACGTCTGAACTC     | 509         |
| AGATCGGAAGAGCACACGTCTGAACTCC    | 428         |
| AGATCGGAAGAGCACACGTCTGAACTCCA   | 417         |
| AGATCGGAAGAGCACACGTCTGAACTCCAG  | 419         |
| AGATCGGAAGAGCACACGTCTGAACTCCAGT | 402         |
| other adapter sequences         | 8778        |

Figure S1. Continued.

Adapter or bad ligation of read2

Input has little adapter percentage (~0.190723%), probably it's trimmed before.

| Sequence                   | Occurrences |
|----------------------------|-------------|
| A                          | 1893        |
| AG                         | 1822        |
| AGA                        | 1660        |
| AGAT                       | 1572        |
| AGATC                      | 3817        |
| AGATCG                     | 1618        |
| AGATCGG                    | 1400        |
| AGATCGGA                   | 1270        |
| AGATCGGAA                  | 1182        |
| AGATCGGAAG                 | 1142        |
| AGATCGGAAGA                | 1157        |
| AGATCGGAAGAG               | 1148        |
| AGATCGGAAGAGC              | 1016        |
| AGATCGGAAGAGCG             | 961         |
| AGATCGGAAGAGCGT            | 918         |
| AGATCGGAAGAGCGTC           | 830         |
| AGATCGGAAGAGCGTCG          | 841         |
| AGATCGGAAGAGCGTCGT         | 731         |
| AGATCGGAAGAGCGTCGTG        | 680         |
| AGATCGGAAGAGCGTCGTGT       | 650         |
| AGATCGGAAGAGCGTCGTGTA      | 622         |
| AGATCGGAAGAGCGTCGTGTAG     | 594         |
| AGATCGGAAGAGCGTCGTGTAGG    | 542         |
| AGATCGGAAGAGCGTCGTGTAGGG   | 605         |
| AGATCGGAAGAGCGTCGTGTAGGGA  | 516         |
| AGATCGGAAGAGCGTCGTGTAGGGA  | 455         |
| AGATCGGAAGAGCGTCGTGTAGGAAA | 480         |
| other adapter sequences    | 11350       |

### Duplication

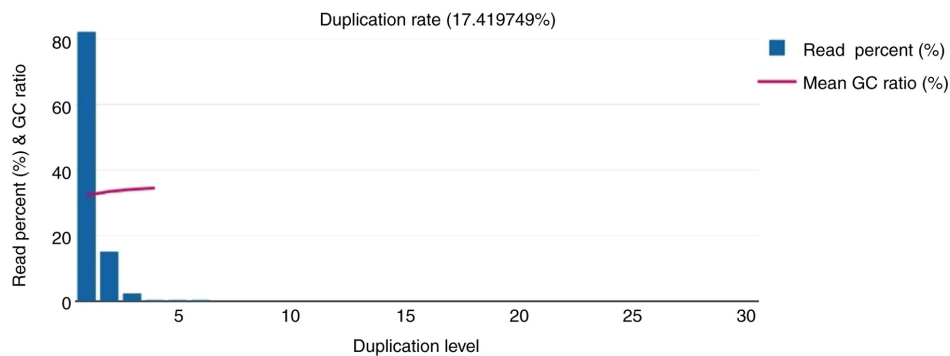

### Insert size estimation

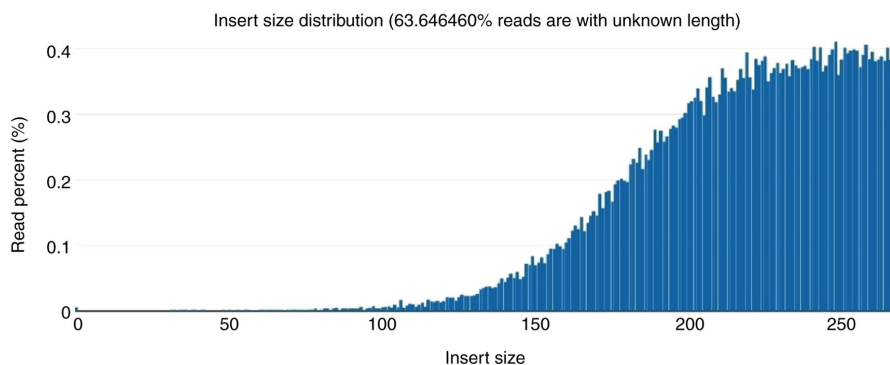

This estimation is based on paired-end overlap analysis, and there are 63.646460% reads found not overlapped. Nonoverlapped read pairs may have insert size <30 or >270, or contain too much sequencing errors to be detected as overlapped.

Figure S1. Continued.

### Before filtering

#### Before filtering: read1: quality

Value of each position will be shown on mouse over.

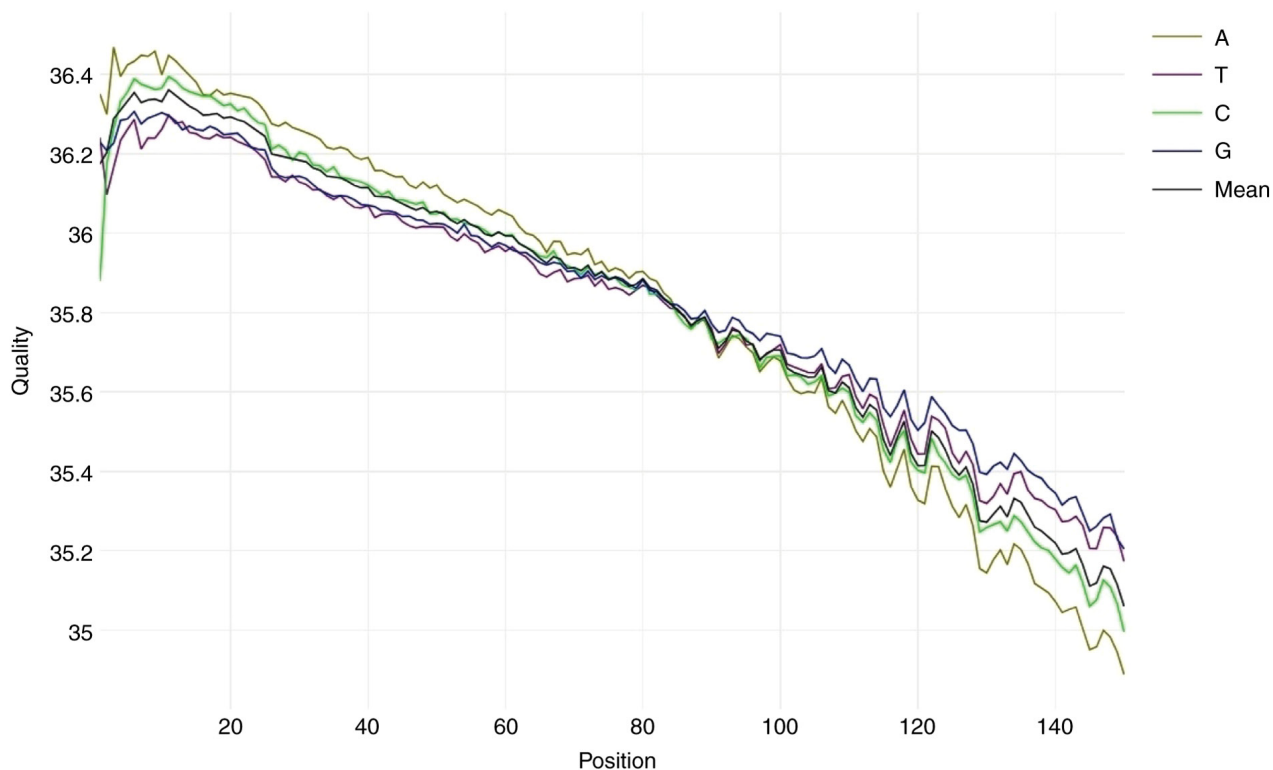

#### Before filtering: read1: base contents

Value of each position will be shown on mouse over.

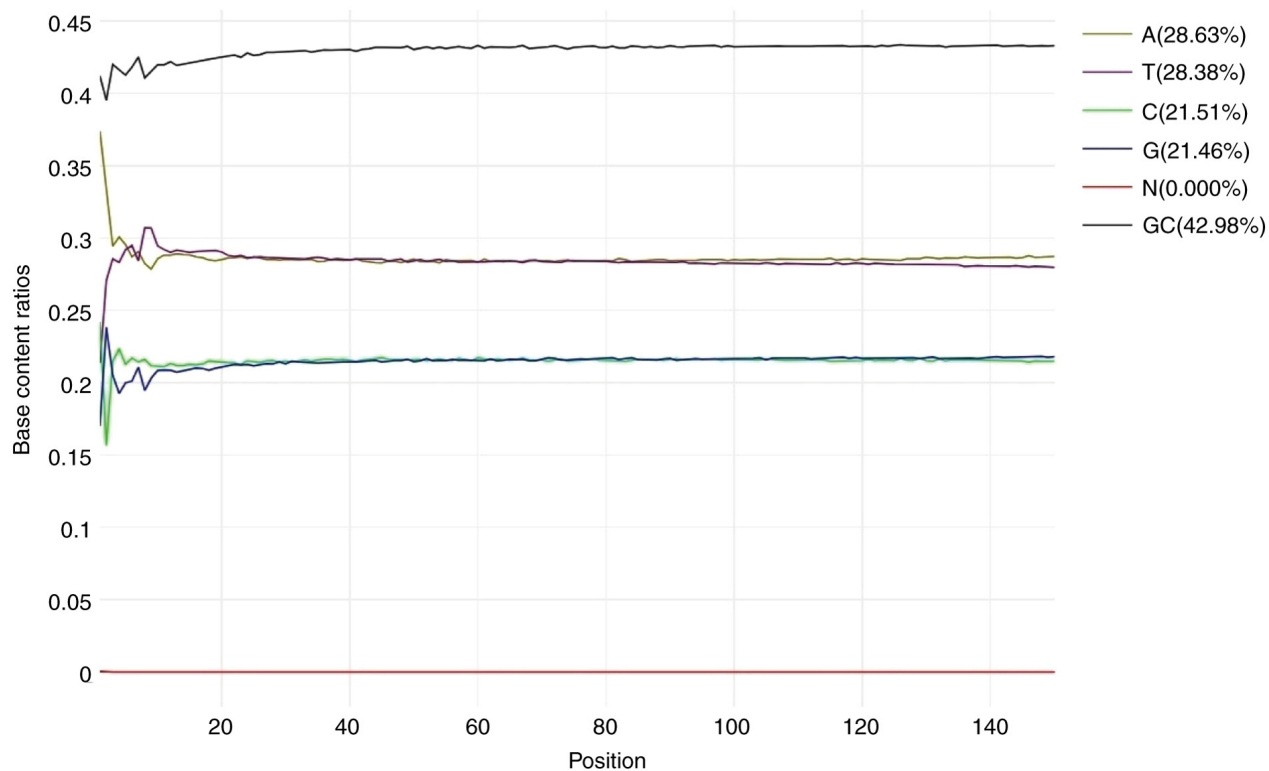





Figure S1. Continued.

### After filtering

After filtering: read1: quality

Value of each position will be shown on mouse over.

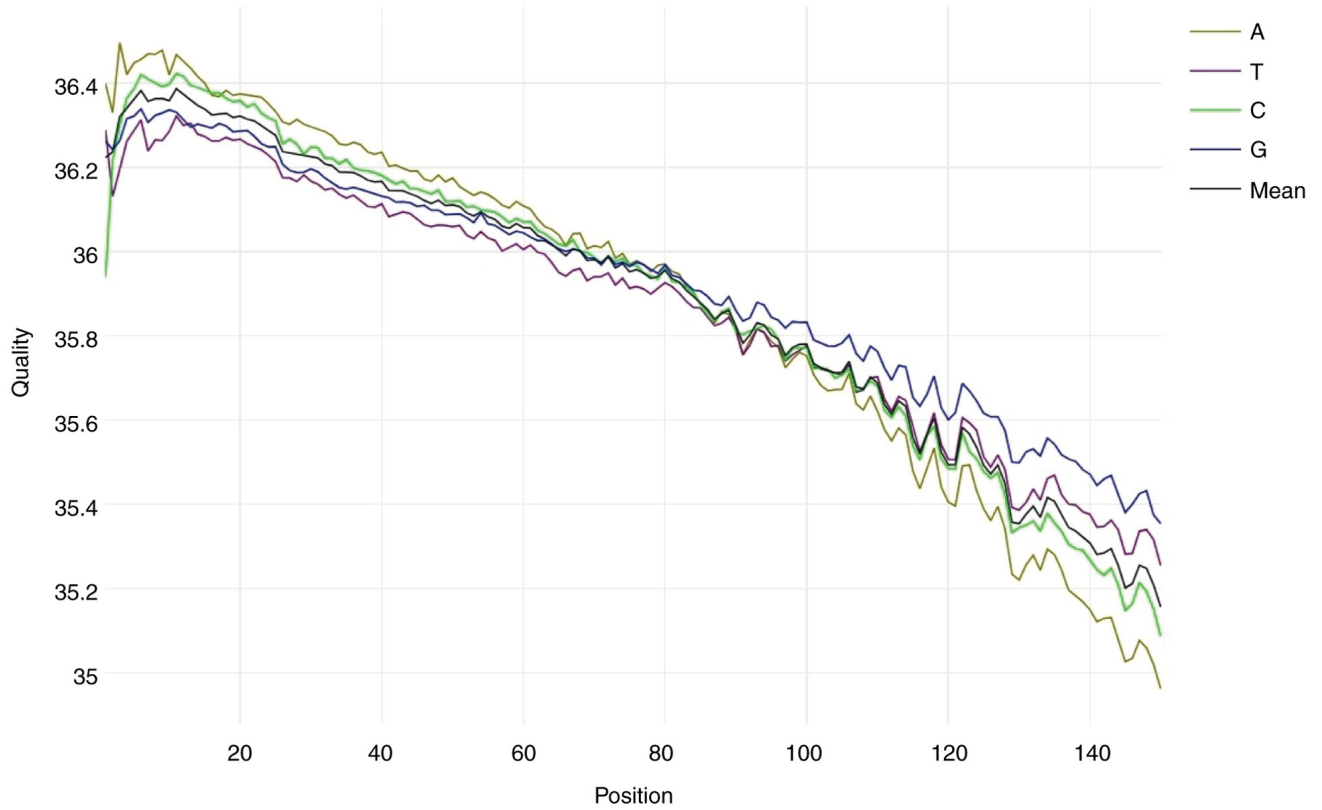

After filtering: read1: base contents

Value of each position will be shown on mouse over.

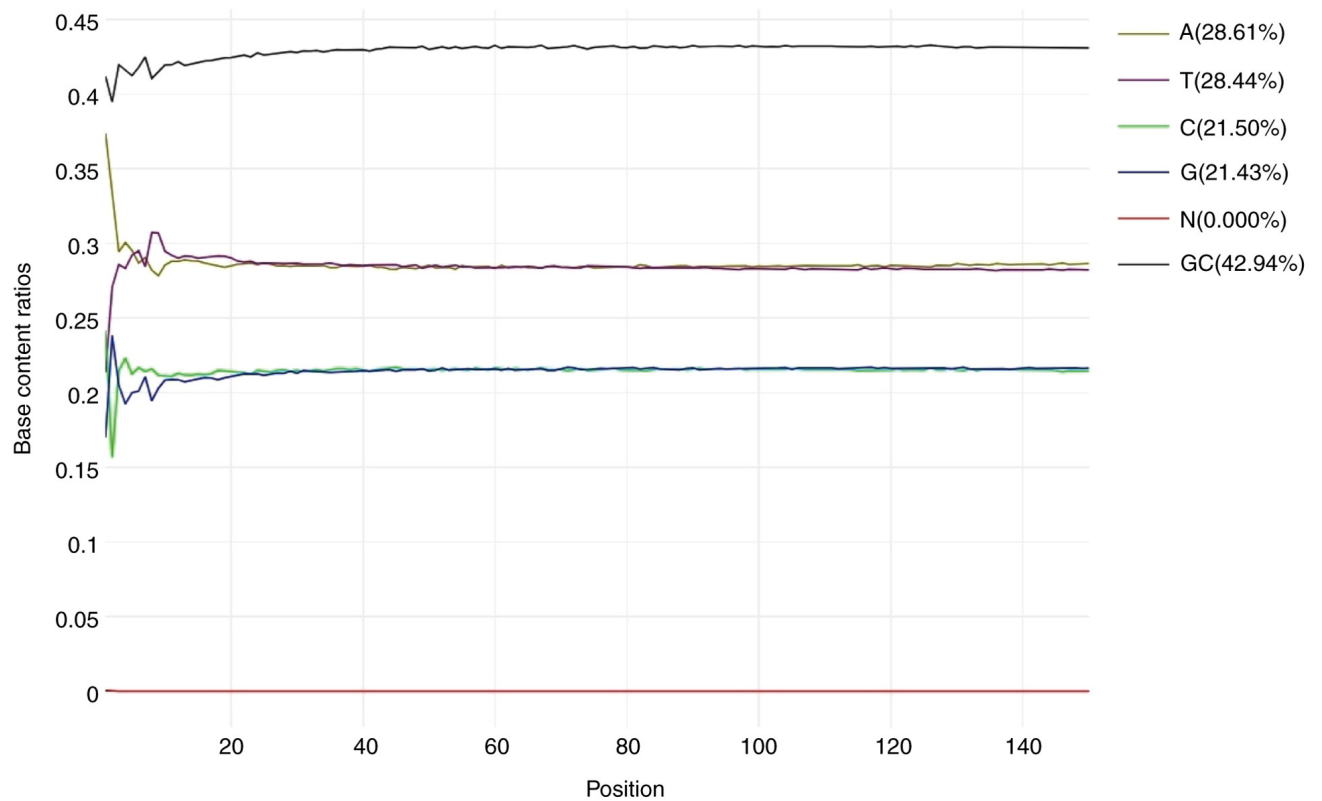



Figure S1. Fastp report for the biopsy specimen (the first technical replicate).

After filtering: read2: base contents

Value of each position will be shown on mouse over.

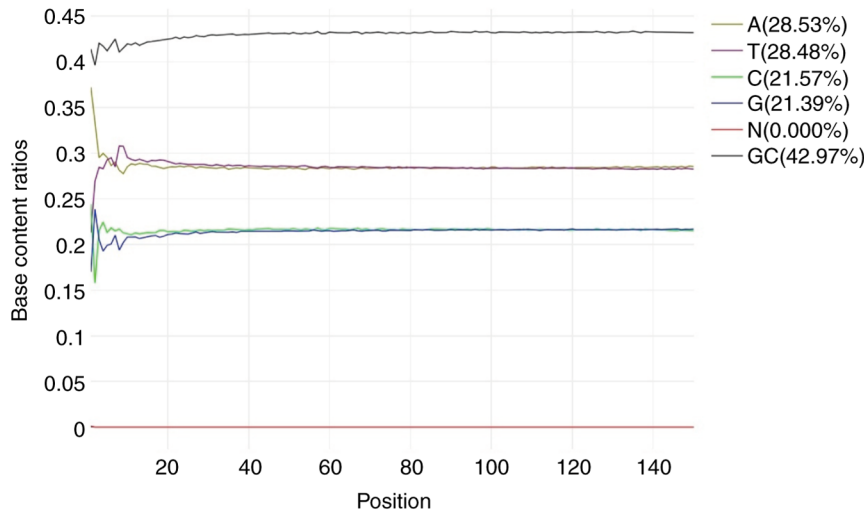

After filtering: read2: KMER counting

Darker background means larger counts. The count will be shown on mouse over.

| AA  | AT   | AC     | AG     | TA     | TT     | TC     | TG     | CA     | CT     | CC     | CG     | GA     | GT     | GC     | GG     |
|-----|------|--------|--------|--------|--------|--------|--------|--------|--------|--------|--------|--------|--------|--------|--------|
| AAA | AAAA | AAAT   | AAAC   | AAAG   | AAATA  | AAATT  | AAATC  | AAATG  | AAACA  | AAACT  | AAACC  | AAACG  | AAAGA  | AAAGT  | AAAGC  |
| AAT | AATA | AATAT  | AATAC  | AATAG  | AATTA  | AATTT  | AATTC  | AATTG  | AATCA  | AATCT  | AATCC  | AATCG  | AATGA  | AATGT  | AATGC  |
| AAC | AACA | AACAT  | AACAC  | AACAG  | AACATA | AACATT | AACATC | AACATG | AACACA | AACACT | AACACC | AACACG | AACAGA | AACAGT | AACAGC |
| AAG | AAGA | AAGAT  | AAGAC  | AAGAG  | AAGATA | AAGATT | AAGATC | AAGATG | AAGACA | AAGACT | AAGACC | AAGACG | AAGAGA | AAGAGT | AAGAGC |
| ATA | ATAA | ATAAT  | ATAAC  | ATAAG  | ATAATA | ATAATT | ATAATC | ATAATG | ATAACA | ATAACT | ATAACC | ATAACG | ATAAGA | ATAAGT | ATAAGC |
| ATT | ATTA | ATTAT  | ATTAC  | ATTAG  | ATTATA | ATTATT | ATTATC | ATTATG | ATTACA | ATTACT | ATTACC | ATTACG | ATTAGA | ATTAGT | ATTAGC |
| ATC | ATCA | ATCAT  | ATCAC  | ATCAG  | ATCTA  | ATCTT  | ATCTC  | ATCTG  | ATCCA  | ATCCT  | ATCCC  | ATCCG  | ATCGA  | ATCGT  | ATCCG  |
| ATG | ATGA | ATGAT  | ATGAC  | ATGAG  | ATGATA | ATGATT | ATGATC | ATGATG | ATGACA | ATGACT | ATGCC  | ATGCG  | ATGGA  | ATGGT  | ATGGC  |
| ACA | ACAA | ACAAT  | ACAAC  | ACAG   | ACATA  | ACATT  | ACATC  | ACATG  | ACACA  | ACACT  | ACACC  | ACACG  | ACAGA  | ACAGT  | ACAGC  |
| ACT | ACTA | ACTAT  | ACTAC  | ACTAG  | ACTATA | ACTATT | ACTATC | ACTATG | ACTACA | ACTACT | ACTACC | ACTACG | ACTAGA | ACTAGT | ACTAGC |
| ACC | ACCA | ACCAT  | ACCAC  | ACCAG  | ACCTA  | ACCTT  | ACCTC  | ACCTG  | ACCCA  | ACCTT  | ACCCC  | ACCCG  | ACCGA  | ACCGT  | ACCCG  |
| ACG | ACGA | ACGAT  | ACGAC  | ACGAG  | ACGTA  | ACGTT  | ACGTC  | ACGTG  | ACGCA  | ACGCT  | ACGCC  | ACGCG  | ACGGA  | ACGGT  | ACGGC  |
| AGT | AGTA | AGTAT  | AGTAC  | AGTAG  | AGTATA | AGTATT | AGTATC | AGTATG | AGTACA | AGTACT | AGTACC | AGTACG | AGTAGA | AGTAGT | AGTAGC |
| AGC | AGCA | AGCAT  | AGCAC  | AGCAG  | AGCTA  | AGCTT  | AGCTC  | AGCTG  | AGCCA  | AGCCT  | AGCCC  | AGCCG  | AGCGA  | AGCGT  | AGCCG  |
| AGS | AGSA | AGSAT  | AGSAC  | AGSAG  | AGSATA | AGSATT | AGSATC | AGSATG | AGSACA | AGSACT | AGSACC | AGSACG | AGSAGA | AGSAGT | AGSAGC |
| TAA | TAAA | TAAAT  | TAAAC  | TAAAG  | TAAATA | TAAATT | TAAATC | TAAATG | TAAACA | TAAACT | TAAACC | TAAACG | TAAAGA | TAAAGT | TAAAGC |
| TAT | TATA | TATAT  | TATAC  | TATAG  | TATATA | TATATT | TATATC | TATATG | TATACA | TATACT | TATACC | TATACG | TATAGA | TATAGT | TATAGC |
| TAC | TACA | TACAT  | TACAC  | TACAG  | TACTA  | TACTT  | TACTC  | TACTG  | TACCA  | TACCT  | TACCC  | TACCG  | TACGA  | TACGT  | TACGC  |
| TAG | TAGA | TAGAT  | TAGAC  | TAGAG  | TAGTA  | TAGTT  | TAGTC  | TAGTG  | TAGCA  | TAGCT  | TAGCC  | TAGCG  | TAGGA  | TAGGT  | TAGGC  |
| TAA | TAAA | TAAAT  | TAAAC  | TAAAG  | TAAATA | TAAATT | TAAATC | TAAATG | TAAACA | TAAACT | TAAACC | TAAACG | TAAAGA | TAAAGT | TAAAGC |
| TTA | TTAA | TTAAT  | TTAAC  | TTAG   | TTATA  | TTATT  | TTATC  | TTATG  | TTACA  | TTACT  | TTACC  | TTACG  | TTAGA  | TTAGT  | TTAGC  |
| TTT | TTTA | TTTAT  | TTTAC  | TTTAG  | TTTTA  | TTTTT  | TTTTC  | TTTTG  | TTTCA  | TTTCT  | TTTCC  | TTTCG  | TTTGA  | TTTGT  | TTTGC  |
| TTG | TTGA | TTGAT  | TTGAC  | TTGAG  | TTGTA  | TTGTT  | TTGTC  | TTGTG  | TTGCA  | TTGCT  | TTGCC  | TTGCG  | TTGGA  | TTGGT  | TTGGC  |
| TCA | TCAA | TCAAT  | TCAAC  | TCAAG  | TCATA  | TCATT  | TCATC  | TCATG  | TCACA  | TCACT  | TCACC  | TCACG  | TCAGA  | TCAGT  | TCAGC  |
| TCT | TCTA | TCTAT  | TCTAC  | TCTAG  | TCTTA  | TCTTT  | TCTTC  | TCTTG  | TCTCA  | TCTCT  | TCTCC  | TCTCG  | TCTGA  | TCTGT  | TCTGC  |
| TCC | TCCA | TCCAT  | TCCAC  | TCCAG  | TCCTA  | TCCTT  | TCCTC  | TCCTG  | TCCCA  | TCCCT  | TCCCC  | TCCCG  | TCCGA  | TCCGT  | TCCGC  |
| TCS | TCSA | TCSAT  | TCSAC  | TCSAG  | TCSATA | TCSATT | TCSATC | TCSATG | TCSACA | TCSACT | TCSACC | TCSACG | TCSAGA | TCSAGT | TCSAGC |
| TGA | TGAA | TGAAT  | TGAAC  | TGAG   | TGATA  | TGATT  | TGATC  | TGATG  | TGACA  | TGACT  | TGACC  | TGACG  | TGAGA  | TGAGT  | TGAGC  |
| TGT | TGTA | TGTAT  | TGTAC  | TGTAG  | TGTATA | TGTATT | TGTATC | TGTATG | TGTACA | TGTACT | TGTACC | TGTACG | TGTAGA | TGTAGT | TGTAGC |
| TGC | TGCA | TGCAT  | TGCAC  | TGCAG  | TGCTA  | TGCTT  | TGCTC  | TGCTG  | TGCCA  | TGCTT  | TGCCC  | TGCCG  | TGCCA  | TGCCG  | TGCCG  |
| TGG | TGGA | TGGAT  | TGGAC  | TGGAG  | TGGTA  | TGGTT  | TGGTC  | TGGTG  | TGGCA  | TGGCT  | TGGCC  | TGGCG  | TGGGA  | TGGGT  | TGGGC  |
| CAA | CAAA | CAAAAT | CAAAAC | CAAAAG | CAATA  | CAATT  | CAATC  | CAATG  | CACAA  | CACAT  | CACAC  | CACAG  | CACAGA | CACAGT | CACAGC |
| CAT | CATA | CATAT  | CATAC  | CATAG  | CATATA | CATATT | CATATC | CATATG | CATACA | CATACT | CATACC | CATACG | CATAGA | CATAGT | CATAGC |
| CAC | CACA | CACAT  | CACAC  | CACAG  | CACATA | CACATT | CACATC | CACATG | CACACA | CACACT | CACACC | CACACG | CACAGA | CACAGT | CACAGC |
| CAG | CAGA | CAGAT  | CAGAC  | CAGAG  | CAGATA | CAGATT | CAGATC | CAGATG | CAGACA | CAGACT | CAGACC | CAGACG | CAGAGA | CAGAGT | CAGAGC |
| CTA | CTAA | CTAAT  | CTAAC  | CTAG   | CTATA  | CTATT  | CTATC  | CTATG  | CTACA  | CTACT  | CTACC  | CTACG  | CTAGA  | CTAGT  | CTAGC  |
| CTT | CTTA | CTTAT  | CTTAC  | CTTAG  | CTTTA  | CTTTT  | CTTTC  | CTTTG  | CTTCA  | CTTCT  | CTTCC  | CTTCG  | CTTGA  | CTTGT  | CTTGC  |
| CTC | CTCA | CTCAT  | CTCAC  | CTCAG  | CTCTA  | CTCTT  | CTCTC  | CTCTG  | CTCCA  | CTCCT  | CTCCC  | CTCCG  | CTCGA  | CTCGT  | CTCCG  |
| CTG | CTGA | CTGAT  | CTGAC  | CTGAG  | CTGTA  | CTGTT  | CTGTC  | CTGTG  | CTGCA  | CTGCT  | CTGCC  | CTGCG  | CTGGA  | CTGGT  | CTGGC  |
| CGA | CGAA | CGAAT  | CGAAC  | CGAG   | CGATA  | CGATT  | CGATC  | CGATG  | CGACA  | CGACT  | CGACC  | CGACG  | CGAGA  | CGAGT  | CGAGC  |
| CGT | CGTA | CGTAT  | CGTAC  | CGTAG  | CGTTA  | CGTTT  | CGTTC  | CGTTG  | CGTCA  | CGTCT  | CGTCC  | CGTCG  | CGTGA  | CGTGT  | CGTGC  |
| CGC | CGCA | CGCAT  | CGCAC  | CGCAG  | CGCTA  | CGCTT  | CGCTC  | CGCTG  | CGCCA  | CGCCT  | CGCCC  | CGCCG  | CGCGA  | CGCGT  | CGCCG  |
| CGG | CGGA | CGGAT  | CGGAC  | CGGAG  | CGGTA  | CGGTT  | CGGTC  | CGGTG  | CGGCA  | CGGCT  | CGGCC  | CGGCG  | CGGGA  | CGGGT  | CGGGC  |
| GAA | GAAA | GAAAT  | GAAAC  | GAAAG  | GAAATA | GAAATT | GAAATC | GAAATG | GAAACA | GAAACT | GAAACC | GAAACG | GAAAGA | GAAAGT | GAAAGC |
| GAT | GATA | GATAT  | GATAC  | GATAG  | GATATA | GATATT | GATATC | GATATG | GATACA | GATACT | GATACC | GATACG | GATAGA | GATAGT | GATAGC |
| GAC | GACA | GACAT  | GACAC  | GACAG  | GACATA | GACATT | GACATC | GACATG | GACACA | GACACT | GACACC | GACACG | GACAGA | GACAGT | GACAGC |
| GAG | GAGA | GAGAT  | GAGAC  | GAGAG  | GAGATA | GAGATT | GAGATC | GAGATG | GAGACA | GAGACT | GAGACC | GAGACG | GAGAGA | GAGAGT | GAGAGC |
| GTA | GTAA | GTAAT  | GTAAC  | GTAG   | GTATA  | GTAATT | GTAATC | GTAATG | GTACA  | GTACT  | GTACC  | GTAACG | GTAGA  | GTAGT  | GTAGC  |
| GTT | GTTA | GTTAT  | GTTAC  | GTTAG  | GTTTA  | GTTTT  | GTTTC  | GTTTG  | GTTCA  | GTTCT  | GTTCC  | GTTTCG | GTTGA  | GTTGT  | GTTGC  |
| GTC | GTCA | GTCAT  | GTCAC  | GTCAG  | GCTA   | GCTT   | GCTC   | GCTG   | GTTCA  | GTTCT  | GTTCC  | GTTTCG | GTTGA  | GTTGT  | GTTGC  |
| GTG | GTGA | GTGAT  | GTGAC  | GTGAG  | GTGTA  | GTGTT  | GTGTC  | GTGTG  | GTGCA  | GTGCT  | GTGCC  | GTGCG  | GTGGA  | GTGGT  | GTGGC  |
| GCA | GCAA | GCAAT  | GCAAC  | GCAAG  | GCAATA | GCAATT | GCAATC | GCAATG | GCAACA | GCAACT | GCAACC | GCAACG | GCAAGA | GCAAGT | GCAAGC |
| GCT | GCTA | GCTAT  | GCTAC  | GCTAG  | GCTTA  | GCTTT  | GCTTC  | GCTTG  | GCTCA  | GCTCT  | GCTCC  | GCTTCG | GCTGA  | GCTGT  | GCTGC  |
| GCC | GCCA | GCCAT  | GCCAC  | GCCAG  | GCCTA  | GCCTT  | GCCTC  | GCCTG  | GCCCA  | GCCCT  | GCCCC  | GCCCG  | GCCGA  | GCCGT  | GCCGC  |
| GCS | GCSA | GCSAT  | GCSAC  | GCSAG  | GCSATA | GCSATT | GCSATC | GCSATG | GCSACA | GCSACT | GCSACC | GCSACG | GCSAGA | GCSAGT | GCSAGC |
| GGA | GAAA | GAAAT  | GAAAC  | GAAAG  | GAAATA | GAAATT | GAAATC | GAAATG | GAAACA | GAAACT | GAAACC | GAAACG | GAAAGA | GAAAGT | GAAAGC |
| GGT | GATA | GATAT  | GATAC  | GATAG  | GATATA | GATATT | GATATC | GATATG | GATACA | GATACT | GATACC | GATACG | GATAGA | GATAGT | GATAGC |
| GGC | GACA | GACAT  | GACAC  | GACAG  | GACATA | GACATT | GACATC | GACATG | GACACA | GACACT | GACACC | GACACG | GACAGA | GACAGT | GACAGC |
| GGS | GAGA | GAGAT  | GAGAC  | GAGAG  | GAGATA | GAGATT | GAGATC | GAGATG | GAGACA | GAGACT | GAGACC | GAGACG | GAGAGA | GAGAGT | GAGAGC |
| GGA | GAAA | GAAAT  | GAAAC  | GAAAG  | GAAATA | GAAATT | GAAATC | GAAATG | GAAACA | GAAACT | GAAACC | GAAACG | GAAAGA | GAAAGT | GAAAGC |
| GGA | GAAA | GAAAT  | GAAAC  | GAAAG  | GAAATA | GAAATT | GAAATC | GAAATG | GAAACA | GAAACT | GAAACC | GAAACG | GAAAGA | GAAAGT | GAAAGC |

```
fastp -i /TJPROJ4/X3/departament_data-nova/shared/231022_A01426_0733_AHNTWDBX5-new/F1M230026084-1A-7UXI0522-SUXI0522/F1M230026084-1A-7UXI0522-SUXI0522_I3_1.fq.gz -I /TJPROJ4/X3/departament_data-nova/shared/231022_A01426_0733_AHNTWDBX5-new/F1M230026084-1A-7UXI0522-SUXI0522/F1M230026084-1A-7UXI0522-SUXI0522_I3_2.fq.gz -o /TJPROJ13/CR/Production/produce/20231025000600/novopm2_tia_50/TXH230050813-1A/TXH230050813-1AG/01.GC/F1M230026084-1A-7UXI0522-SUXI0522_I3_1_clean.fq -o /TJPROJ13/CR/Production/produce/20231025000600/novopm2_tia_50/TXH230050813-1A/TXH230050813-1AG/01.GC/F1M230026084-1A-7UXI0522-SUXI0522_I3_2_clean.fq -h /TJPROJ13/CR/Production/produce/20231025000600/novopm2_tia_50/TXH230050813-1A/TXH230050813-1AG/01.GC/F1M230026084-1A-7UXI0522-SUXI0522_I3_fastp.html -j /TJPROJ13/CR/Production/produce/20231025000600/novopm2_tia_50/TXH230050813-1A/TXH230050813-1AG/01.GC/F1M230026084-1A-7UXI0522-SUXI0522_I3_fastp.json --detect_adapter_for_pe -w 12
```

fastp 0.21.0, at 2023-10-25 18:08:25

Figure S2. Continued.

Fastp report

**Summary**

| General                       |                                                                                              |
|-------------------------------|----------------------------------------------------------------------------------------------|
| fastp version:                | 0.21.0 ( <a href="https://github.com/OpenGene/fastp">https://github.com/OpenGene/fastp</a> ) |
| sequencing:                   | paired end (150 cycles + 150 cycles)                                                         |
| mean length before filtering: | 150bp, 150bp                                                                                 |
| mean length after filtering:  | 148bp, 148bp                                                                                 |
| duplication rate:             | 21.392373%                                                                                   |
| Insert size peak:             | 203                                                                                          |
| Detected read1 adapter:       | AGATCGGAAGAGCACACGTCTGAACTCCAGTCA                                                            |
| Detected read2 adapter:       | AGATCGGAAGAGCGTCGTGTAGGGAAAGAGTGT                                                            |

| Before filtering |                         |
|------------------|-------------------------|
| total reads:     | 22.537354 M             |
| total bases:     | 3.380603 G              |
| Q20 bases:       | 3.288208 G (97.266902%) |
| Q30 bases:       | 3.141848 G (92.937504%) |
| GC content:      | 43.437434%              |

| After filtering |                         |
|-----------------|-------------------------|
| total reads:    | 22.329500 M             |
| total bases:    | 3.312397 G              |
| Q20 bases:      | 3.231493 G (97.557544%) |
| Q30 bases:      | 3.090959 G (93.314853%) |
| GC content:     | 43.322502%              |

| Filtering result        |                          |
|-------------------------|--------------------------|
| reads passed filters:   | 22.329500 M (99.077736%) |
| reads with low quality: | 205.514000 K (0.911882%) |
| reads with too many N:  | 782 (0.003470%)          |
| reads too short:        | 1.558000 K (0.006913%)   |

**Adapters**

Adapter or bad ligation of read1

| Sequence                            | Occurrences |
|-------------------------------------|-------------|
| A                                   | 29625       |
| AG                                  | 28272       |
| AGA                                 | 27542       |
| AGAT                                | 26912       |
| AGATC                               | 34975       |
| AGATCG                              | 25737       |
| AGATCGG                             | 23840       |
| AGATCGGA                            | 23315       |
| AGATCGGAA                           | 22118       |
| AGATCGGAAG                          | 21764       |
| AGATCGGAAGA                         | 20958       |
| AGATCGGAAGAG                        | 19817       |
| AGATCGGAAGAGC                       | 19116       |
| AGATCGGAAGAGCA                      | 18935       |
| AGATCGGAAGAGCAC                     | 18068       |
| AGATCGGAAGAGCACAC                   | 17356       |
| AGATCGGAAGAGCACACAC                 | 16622       |
| AGATCGGAAGAGCACACAG                 | 16029       |
| AGATCGGAAGAGCACACAGT                | 15798       |
| AGATCGGAAGAGCACACAGTC               | 14813       |
| AGATCGGAAGAGCACACAGTCT              | 14326       |
| AGATCGGAAGAGCACACAGTCTG             | 13939       |
| AGATCGGAAGAGCACACAGTCTGA            | 13415       |
| AGATCGGAAGAGCACACAGTCTGAA           | 12667       |
| AGATCGGAAGAGCACACAGTCTGAAC          | 12425       |
| AGATCGGAAGAGCACACAGTCTGAACT         | 11843       |
| AGATCGGAAGAGCACACAGTCTGAACTC        | 11437       |
| AGATCGGAAGAGCACACAGTCTGAACTCC       | 10871       |
| AGATCGGAAGAGCACACAGTCTGAACTCCA      | 10445       |
| AGATCGGAAGAGCACACAGTCTGAACTCCAG     | 10151       |
| AGATCGGAAGAGCACACAGTCTGAACTCCAGT    | 9799        |
| AGATCGGAAGAGCACACAGTCTGAACTCCAGTC   | 9914        |
| AGATCGGAAGAGCACACAGTCTGAACTCCAGTCA  | 8820        |
| AGATCGGAAGAGCACACAGTCTGAACTCCAGTCAC | 8736        |
| other adapter sequences             | 223213      |

Figure S2. Continued.

Adapter or bad ligation of read2

| Sequence                         | Occurrences |
|----------------------------------|-------------|
| A                                | 29699       |
| AG                               | 28471       |
| AGA                              | 27777       |
| AGAT                             | 27214       |
| AGATC                            | 35399       |
| AGATCG                           | 26002       |
| AGATCGG                          | 24184       |
| AGATCGGA                         | 23629       |
| AGATCGGAA                        | 22020       |
| AGATCGGAAG                       | 21665       |
| AGATCGGAAGA                      | 20949       |
| AGATCGGAAGAG                     | 19943       |
| AGATCGGAAGAGC                    | 19089       |
| AGATCGGAAGAGCG                   | 18939       |
| AGATCGGAAGAGCGCT                 | 17968       |
| AGATCGGAAGAGCGCTC                | 17341       |
| AGATCGGAAGAGCGCTCG               | 16723       |
| AGATCGGAAGAGCGCTCGT              | 15795       |
| AGATCGGAAGAGCGCTCGTG             | 15631       |
| AGATCGGAAGAGCGCTCGTGT            | 14556       |
| AGATCGGAAGAGCGCTCGTGTG           | 13885       |
| AGATCGGAAGAGCGCTCGTGTAG          | 13359       |
| AGATCGGAAGAGCGCTCGTGTAGG         | 13004       |
| AGATCGGAAGAGCGCTCGTGTAGGG        | 12224       |
| AGATCGGAAGAGCGCTCGTGTAGGGA       | 11942       |
| AGATCGGAAGAGCGCTCGTGTAGGGA       | 10840       |
| AGATCGGAAGAGCGCTCGTGTAGGGA       | 10534       |
| AGATCGGAAGAGCGCTCGTGTAGGGAAG     | 9981        |
| AGATCGGAAGAGCGCTCGTGTAGGGAAGA    | 9773        |
| AGATCGGAAGAGCGCTCGTGTAGGGAAGAG   | 9364        |
| AGATCGGAAGAGCGCTCGTGTAGGGAAGAGT  | 8946        |
| AGATCGGAAGAGCGCTCGTGTAGGGAAGAGTG | 8533        |
| other adapter sequences          | 245327      |

Duplication

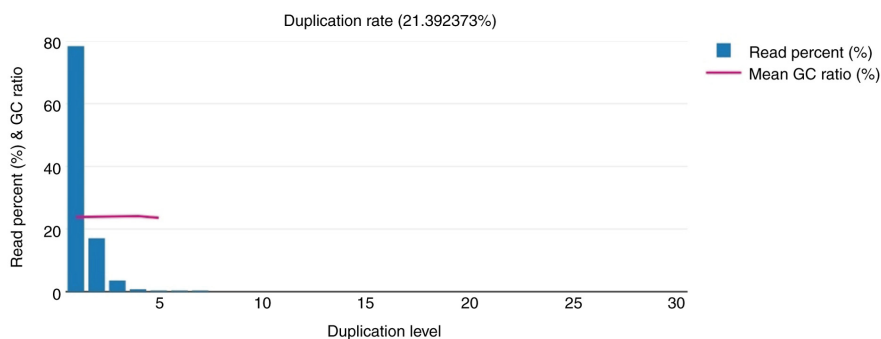

Insert size estimation

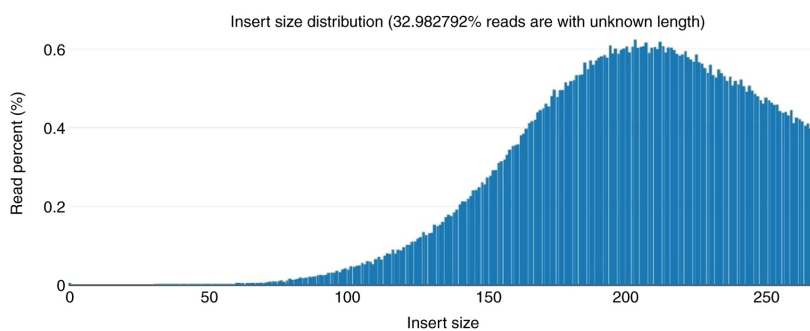

This estimation is based on paired-end overlap analysis, and there are 32.982792% reads found not overlapped. Nonoverlapped read pairs may have insert size <30 or >270, or contain too much sequencing errors to be detected as overlapped.

Figure S2. Continued.

### Before filtering

#### Before filtering: read1: quality

Value of each position will be shown on mouse over.

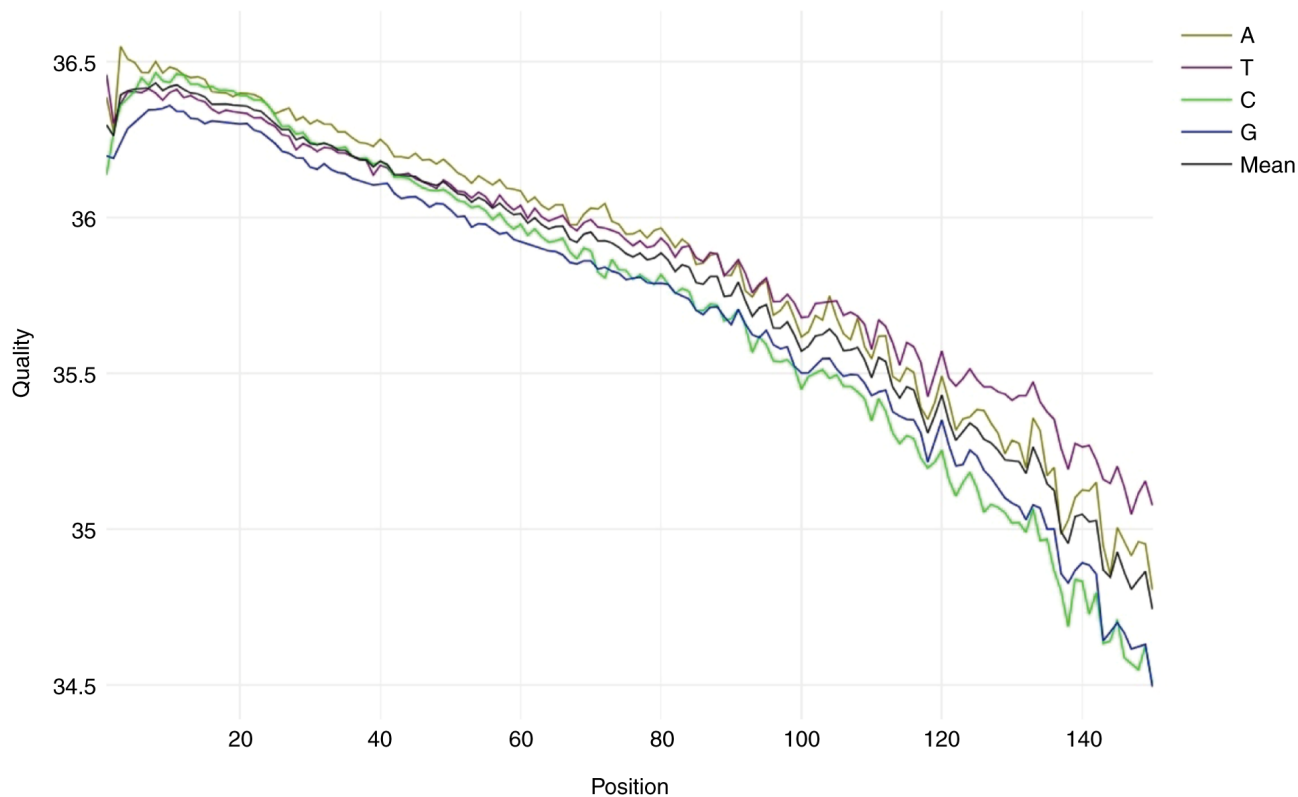

#### Before filtering: read1: base contents

Value of each position will be shown on mouse over.

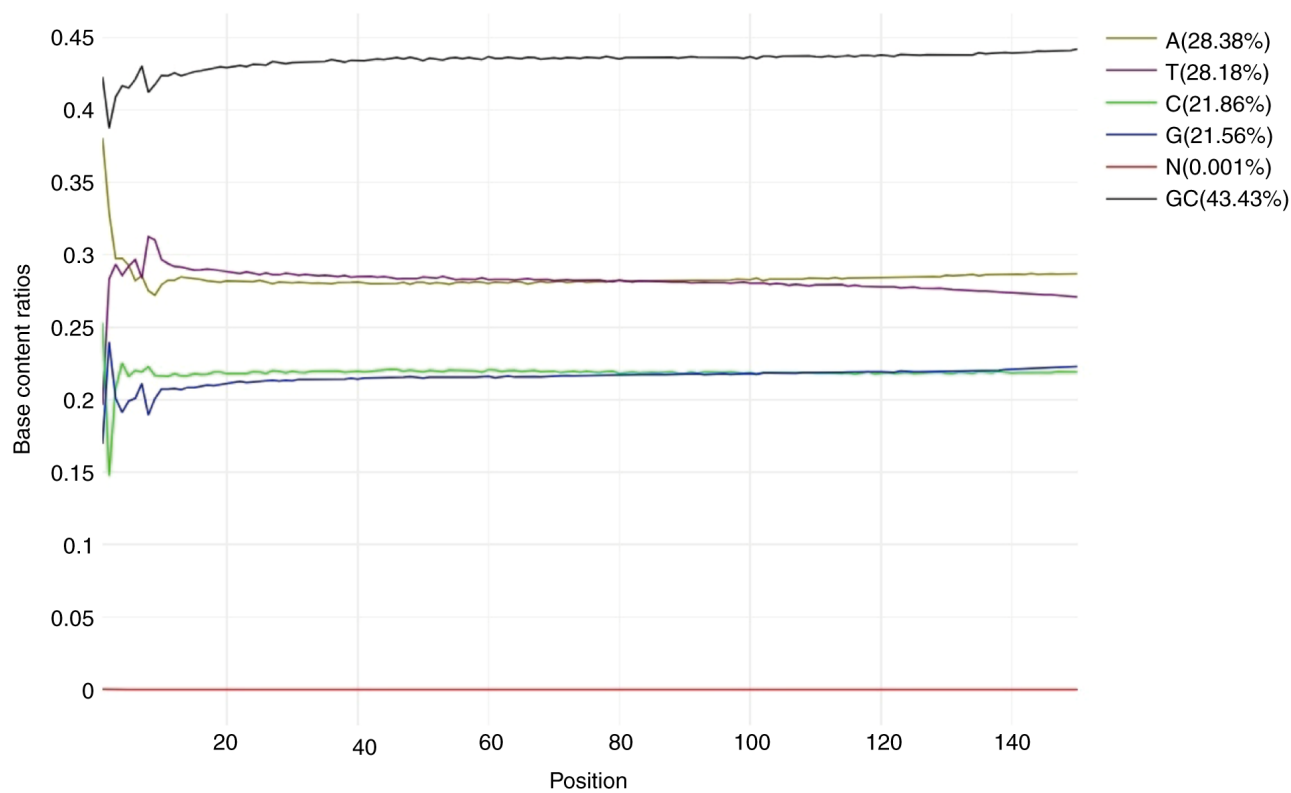

Figure S2. Continued.

Before filtering: read1: KMER counting

Darker background means larger counts. The count will be shown on mouse over.

|     | AA    | AT     | AC     | AG     | TA     | TT     | TC     | TG     | CA     | CT     | CC     | CG      | GA     | GT     | GC     | GG     |
|-----|-------|--------|--------|--------|--------|--------|--------|--------|--------|--------|--------|---------|--------|--------|--------|--------|
| AAA | AAAA  | AAAT   | AAAC   | AAAG   | AAATA  | AAATT  | AAATC  | AAATG  | AAACA  | AAACT  | AAACC  | AAACG   | AAAGA  | AAAGT  | AAAGC  | AAAGG  |
| AAT | AAATA | AAATAT | AAATAC | AAATAG | AAATTA | AAATTT | AAATTC | AAATTG | AAATCA | AAATCT | AAATCC | AAATCG  | AAATGA | AAATGT | AAATGC | AAATGG |
| AAC | AACAA | AACAT  | AACAC  | AACAG  | AACATA | AACATT | AACATC | AACATG | AACACA | AACACT | AACACC | AACACG  | AACAGA | AACAGT | AACAGC | AACAGG |
| AAG | AAGAA | AAGAT  | AAGAC  | AAGAG  | AAGATA | AAGATT | AAGATC | AAGATG | AAGACA | AAGACT | AAGACC | AAGACG  | AAGAGA | AAGAGT | AAGAGC | AAGAGG |
| ATA | ATAAA | ATAAT  | ATAAC  | ATAAG  | ATATA  | ATATT  | ATATC  | ATATG  | ATACA  | ATACT  | ATACC  | ATACG   | ATAGA  | ATAGT  | ATAGC  | ATAGG  |
| ATT | ATTAA | ATTAT  | ATTAC  | ATTAG  | ATTTA  | ATTTT  | ATTTC  | ATTTG  | ATTCA  | ATTCT  | ATTCC  | ATTTCG  | ATTGA  | ATTGT  | ATTGC  | ATTGG  |
| ATC | ATCAA | ATCAT  | ATCAC  | ATCAG  | ATCATA | ATCATT | ATCATC | ATCATG | ATCACA | ATCACT | ATCACC | ATCACG  | ATCAGA | ATCAGT | ATCAGC | ATCAGG |
| ATG | ATGAA | ATGAT  | ATGAC  | ATGAG  | ATGATA | ATGATT | ATGATC | ATGATG | ATGACA | ATGACT | ATGACC | ATGACG  | ATGAGA | ATGAGT | ATGAGC | ATGAGG |
| ACA | ACAAA | ACAAT  | ACAAC  | ACAAG  | ACATA  | ACATT  | ACATC  | ACATG  | ACACA  | ACACT  | ACACC  | ACACG   | ACAGA  | ACAGT  | ACAGC  | ACAGG  |
| ACT | ACTAA | ACTAT  | ACTAC  | ACTAG  | ACTTA  | ACTTT  | ACTTC  | ACTTG  | ACTCA  | ACTCT  | ACTCC  | ACTTCG  | ACTGA  | ACTGT  | ACTGC  | ACTGG  |
| ACC | ACCAA | ACCAT  | ACCAC  | ACCAG  | ACCTA  | ACCTT  | ACCTC  | ACCTG  | ACCCA  | ACCTCT | ACCTCC | ACCTCG  | ACCTGA | ACCTGT | ACCTGC | ACCTGG |
| ACG | ACGAA | ACGAT  | ACGAC  | ACGAG  | ACGATA | ACGATT | ACGATC | ACGATG | ACGACA | ACGACT | ACGACC | ACGACG  | ACGAGA | ACGAGT | ACGAGC | ACGAGG |
| AGA | AGAAA | AGAAT  | AGAAC  | AGAAG  | AGATA  | AGATT  | AGATC  | AGATG  | AGACA  | AGACT  | AGACC  | AGACG   | AGAGA  | AGAGT  | AGAGC  | AGAGG  |
| AGT | AGTAA | AGTAT  | AGTAC  | AGTAG  | AGTTA  | AGTTT  | AGTTC  | AGTTG  | AGTCA  | AGTCT  | AGTCC  | AGTTTCG | AGTGA  | AGTGT  | AGTGC  | AGTGG  |
| AGC | AGCAA | AGCAT  | AGCAC  | AGCAG  | AGCTA  | AGCTT  | AGCTC  | AGCTG  | AGCCA  | AGCTCT | AGCTCC | AGCTCG  | AGCTGA | AGCTGT | AGCTGC | AGCTGG |
| AGG | AGGAA | AGGAT  | AGGAC  | AGGAG  | AGGATA | AGGATT | AGGATC | AGGATG | AGGACA | AGGACT | AGGACC | AGGACG  | AGGAGA | AGGAGT | AGGAGC | AGGAGG |
| TAA | TAAAA | TAAAT  | TAAAC  | TAAAG  | TAATA  | TAATT  | TAATC  | TAATG  | TAAACA | TAAACT | TAAACC | TAAACG  | TAAAGA | TAAAGT | TAAAGC | TAAAGG |
| TAT | TATAA | TATAT  | TATAC  | TATAG  | TATTA  | TATTT  | TATTC  | TATTG  | TATCA  | TATCT  | TATCC  | TATTCG  | TATGA  | TATGT  | TATGC  | TATGG  |
| TAC | TACAA | TACAT  | TACAC  | TACAG  | TACTA  | TACTT  | TACTC  | TACTG  | TACCA  | TACTCT | TACTCC | TACTCG  | TACTGA | TACTGT | TACTGC | TACTGG |
| TAG | TAGAA | TAGAT  | TAGAC  | TAGAG  | TAGTA  | TAGTT  | TAGTC  | TAGTG  | TAGCA  | TAGCT  | TAGCC  | TAGTCG  | TAGGA  | TAGGT  | TAGGC  | TAGGG  |
| TTA | TTAAA | TTAAAT | TTAAAC | TTAAAG | TTATA  | TTATT  | TTATC  | TTATG  | TTACA  | TTACT  | TTACC  | TTATTCG | TTTGA  | TTTGT  | TTTGC  | TTTGG  |
| TTT | TTTAA | TTTAT  | TTTAC  | TTTAG  | TTTTA  | TTTTT  | TTTTC  | TTTTG  | TTTCA  | TTTCT  | TTTCC  | TTTTCG  | TTTGA  | TTTGT  | TTTGC  | TTTGG  |
| TTG | TTGAA | TTGAT  | TTGAC  | TTGAG  | TTGTA  | TTGTT  | TTGTC  | TTGTG  | TTGCA  | TTGCT  | TTGCC  | TTGTCG  | TTTGA  | TTTGT  | TTTGC  | TTTGG  |
| TTG | TTGAA | TTGAT  | TTGAC  | TTGAG  | TTGTA  | TTGTT  | TTGTC  | TTGTG  | TTGCA  | TTGCT  | TTGCC  | TTGTCG  | TTTGA  | TTTGT  | TTTGC  | TTTGG  |
| TGA | TGAAA | TGAAT  | TGAAC  | TGAAG  | TGATA  | TGATT  | TGATC  | TGATG  | TGACA  | TGACT  | TGACC  | TGACG   | TGAGA  | TGAGT  | TGAGC  | TGAGG  |
| TGT | TGTAA | TGTAT  | TGTAC  | TGTAG  | TGTTA  | TGTTT  | TGTTC  | TGTTG  | TGTCA  | TGTCT  | TGTCC  | TGTTCG  | TGTGA  | TGTGT  | TGTGC  | TGTGG  |
| TGC | TGCAA | TGCAT  | TGCAC  | TGCAG  | TGCTA  | TGCTT  | TGCTC  | TGCTG  | TGCCA  | TGCTCT | TGCTCC | TGCTTCG | TGCTGA | TGCTGT | TGCTGC | TGCTGG |
| TGC | TGCAA | TGCAT  | TGCAC  | TGCAG  | TGCTA  | TGCTT  | TGCTC  | TGCTG  | TGCCA  | TGCTCT | TGCTCC | TGCTTCG | TGCTGA | TGCTGT | TGCTGC | TGCTGG |
| TGG | TGAAA | TGAAT  | TGAAC  | TGAAG  | TGATA  | TGATT  | TGATC  | TGATG  | TGACA  | TGACT  | TGACC  | TGACG   | TGAGA  | TGAGT  | TGAGC  | TGAGG  |
| TGA | TGAAA | TGAAT  | TGAAC  | TGAAG  | TGATA  | TGATT  | TGATC  | TGATG  | TGACA  | TGACT  | TGACC  | TGACG   | TGAGA  | TGAGT  | TGAGC  | TGAGG  |
| TGT | TGTAA | TGTAT  | TGTAC  | TGTAG  | TGTTA  | TGTTT  | TGTTC  | TGTTG  | TGTCA  | TGTCT  | TGTCC  | TGTTCG  | TGTGA  | TGTGT  | TGTGC  | TGTGG  |
| TGC | TGCAA | TGCAT  | TGCAC  | TGCAG  | TGCTA  | TGCTT  | TGCTC  | TGCTG  | TGCCA  | TGCTCT | TGCTCC | TGCTTCG | TGCTGA | TGCTGT | TGCTGC | TGCTGG |
| TGG | TGAAA | TGAAT  | TGAAC  | TGAAG  | TGATA  | TGATT  | TGATC  | TGATG  | TGACA  | TGACT  | TGACC  | TGACG   | TGAGA  | TGAGT  | TGAGC  | TGAGG  |
| CAA | CAAAA | CAAAAT | CAAAAC | CAAAAG | CAATA  | CAATT  | CAATC  | CAATG  | CAACA  | CAACT  | CAACC  | CAACG   | CAAGA  | CAAGT  | CAAGC  | CAAGG  |
| CAT | CATAA | CATAT  | CATAC  | CATAG  | CATTA  | CATTT  | CATTC  | CATTG  | CATCA  | CATCT  | CATCC  | CATTCG  | CATGA  | CATGT  | CATGC  | CATGG  |
| CAC | CACAA | CACAT  | CACAC  | CACAG  | CACATA | CACATT | CACATC | CACATG | CACACA | CACACT | CACACC | CACACG  | CACAGA | CACAGT | CACAGC | CACAGG |
| CAG | CAGAA | CAGAT  | CAGAC  | CAGAG  | CAGTA  | CAGTT  | CAGTC  | CAGTG  | CAGCA  | CAGCT  | CAGCC  | CAGTCG  | CAGGA  | CAGGT  | CAGGC  | CAGGG  |
| CTA | CTAAA | CTAAT  | CTAAC  | CTAAG  | CTATA  | CTATT  | CTATC  | CTATG  | CTACA  | CTACT  | CTACC  | CTATTCG | CTTGA  | CTTGT  | CTTGC  | CTTGG  |
| CTT | CTTAA | CTTAT  | CTTAC  | CTTAG  | CTTTA  | CTTTT  | CTTTC  | CTTTG  | CTTCA  | CTTCT  | CTTCC  | CTTTCG  | CTTGA  | CTTGT  | CTTGC  | CTTGG  |
| CTC | CTCAA | CTCAT  | CTCAC  | CTCAG  | CTCTA  | CTCTT  | CTCTC  | CTCTG  | CTCCA  | CTCTCT | CTCTCC | CTCTTCG | CTCTGA | CTCTGT | CTCTGC | CTCTGG |
| CTG | CTGAA | CTGAT  | CTGAC  | CTGAG  | CTGTA  | CTGTT  | CTGTC  | CTGTG  | CTGCA  | CTGCT  | CTGCC  | CTGTCG  | CTTGA  | CTTGT  | CTTGC  | CTTGG  |
| CCA | CCAAA | CCAAAT | CCAAAC | CCAAAG | CCATA  | CCATT  | CCATC  | CCATG  | CCACA  | CCACT  | CCACC  | CCACG   | CCAGA  | CCAGT  | CCAGC  | CCAGG  |
| CCT | CCTAA | CCTAT  | CCTAC  | CCTAG  | CCTTA  | CCTTT  | CCTTC  | CCTTG  | CCTCA  | CCTCT  | CCTCC  | CCTTCG  | CCTGA  | CCTGT  | CCTGC  | CCTGG  |
| CCC | CCCAA | CCCAAT | CCCAAC | CCCAAG | CCATA  | CCATT  | CCATC  | CCATG  | CCACA  | CCACT  | CCACC  | CCACG   | CCAGA  | CCAGT  | CCAGC  | CCAGG  |
| CCG | CCGAA | CCGAT  | CCGAC  | CCGAG  | CCGTA  | CCGTT  | CCGTC  | CCGTG  | CCGCA  | CCGCT  | CCGCC  | CCGTCG  | CCGGA  | CCGGT  | CCGGC  | CCGGG  |
| CCG | CCGAA | CCGAT  | CCGAC  | CCGAG  | CCGTA  | CCGTT  | CCGTC  | CCGTG  | CCGCA  | CCGCT  | CCGCC  | CCGTCG  | CCGGA  | CCGGT  | CCGGC  | CCGGG  |
| CGA | CGAAA | CGAAT  | CGAAC  | CGAAG  | CGATA  | CGATT  | CGATC  | CGATG  | CGACA  | CGACT  | CGACC  | CGACG   | CGAGA  | CGAGT  | CGAGC  | CGAGG  |
| CGT | CGTAA | CGTAT  | CGTAC  | CGTAG  | CGTTA  | CGTTT  | CGTTC  | CGTTG  | CGTCA  | CGTCT  | CGTCC  | CGTTCG  | CGTGA  | CGTGT  | CGTGC  | CGTGG  |
| CGC | CGCAA | CGCAT  | CGCAC  | CGCAG  | CGCTA  | CGCTT  | CGCTC  | CGCTG  | CGCCA  | CGCTCT | CGCTCC | CGCTTCG | CGCTGA | CGCTGT | CGCTGC | CGCTGG |
| CGG | CGGAA | CGGAT  | CGGAC  | CGGAG  | CGGTA  | CGGTT  | CGGTC  | CGGTG  | CGGCA  | CGGCT  | CGGCC  | CGGTCG  | CGGGA  | CGGGT  | CGGGC  | CGGGG  |
| GAA | GAAAA | GAAAT  | GAAAC  | GAAAG  | GAATA  | GAATT  | GAATC  | GAATG  | GAACA  | GAACT  | GAACC  | GAACG   | GAAGA  | GAAGT  | GAAGC  | GAAGG  |
| GAT | GATAA | GATAT  | GATAC  | GATAG  | GATTA  | GATTT  | GATTC  | GATTG  | GATCA  | GATCT  | GATCC  | GATTCG  | GATGA  | GATGT  | GATGC  | GATGG  |
| GAC | GACAA | GACAT  | GACAC  | GACAG  | GACTA  | GACTT  | GACTC  | GACTG  | GACCA  | GACTCT | GACTCC | GACTTCG | GACTGA | GACTGT | GACTGC | GACTGG |
| GAG | GAGAA | GAGAT  | GAGAC  | GAGAG  | GAGTA  | GAGTT  | GAGTC  | GAGTG  | GAGCA  | GAGCT  | GAGCC  | GAGTCG  | GAGGA  | GAGGT  | GAGGC  | GAGGG  |
| GTA | GTAOA | GTAAT  | GTAAC  | GTAAG  | GTATA  | GTATT  | GTATC  | GTATG  | GTACA  | GTACT  | GTACC  | GTATTCG | GTAGA  | GTAGT  | GTAGC  | GTAGG  |
| GTT | GTTAA | GTTAT  | GTTAC  | GTTAG  | GTTTA  | GTTTT  | GTTTC  | GTTTG  | GTTCA  | GTTCT  | GTTCC  | GTTTCG  | GTTGA  | GTTGT  | GTTGC  | GTTGG  |
| GTC | GTCOA | GTCAT  | GTCAC  | GTCAG  | GCTTA  | GCTTT  | GCTTC  | GCTTG  | GTTCA  | GTTCT  | GTTCC  | GTTTCG  | GTTGA  | GTTGT  | GTTGC  | GTTGG  |
| GTC | GTCOA | GTCAT  | GTCAC  | GTCAG  | GCTTA  | GCTTT  | GCTTC  | GCTTG  | GTTCA  | GTTCT  | GTTCC  | GTTTCG  | GTTGA  | GTTGT  | GTTGC  | GTTGG  |
| GTG | GTAAA | GTAAAT | GTAAAC | GTAAAG | GTATA  | GTATT  | GTATC  | GTATG  | GTACA  | GTACT  | GTACC  | GTATTCG | GTAGA  | GTAGT  | GTAGC  | GTAGG  |
| GCA | GCAAA | GCAAT  | GCAAC  | GCAAG  | GCATA  | GCATT  | GCATC  | GCATG  | GCACA  | GCACT  | GCACC  | GCACG   | GCAGA  | GCAGT  | GCAGC  | GCAGG  |
| GCT | GCTAA | GCTAT  | GCTAC  | GCTAG  | GCTTA  | GCTTT  | GCTTC  | GCTTG  | GCTCA  | GCTCT  | GCTCC  | GCTTCG  | GCTGA  | GCTGT  | GCTGC  | GCTGG  |
| GCC | GCCAA | GCCAT  | GCCAC  | GCCAG  | GCCTA  | GCCTT  | GCCTC  | GCCTG  | GCCCA  | GCCCT  | GCCCC  | GCCTCG  | GCCGA  | GCCGT  | GCCGC  | GCCGG  |
| GCG | GCGAA | GCGAT  | GCGAC  | GCGAG  | GCGTA  | GCGTT  | GCGTC  | GCGTG  | GCGCA  | GCGCT  | GCGCC  | GCGTCG  | GCGGA  | GCGGT  | GCGGC  | GCGGG  |
| GGA | GGAOA | GGAAT  | GGAAC  | GGAAG  | GGATA  | GGATT  | GGATC  | GGATG  | GGACA  | GGACT  | GGACC  | GGATTCG | GGAGA  | GGAGT  | GGAGC  | GGAGG  |
| GGT | GGTAA | GGTAT  | GGTAC  | GGTAG  | GGTTA  | GGTTT  | GGTTC  | GGTTG  | GGTCA  | GGTCT  | GGTCC  | GGTTCG  | GGTGA  | GGTGT  | GGTGC  | GGTGG  |
| GGC | GGCAA | GGCAT  | GGCAC  | GGCAG  | GGCTA  | GGCTT  | GGCTC  | GGCTG  | GGCCA  | GGCTCT | GGCTCC | GGCTTCG | GGCTGA | GGCTGT | GGCTGC | GGCTGG |
| GGG | GGGAA | GGGAT  | GGGAC  | GGGAG  | GGGTA  | GGGTT  | GGGTC  | GGGTG  | GGGCA  | GGGCT  | GGGCC  | GGGTCG  | GGGGA  | GGGGT  | GGGGC  | GGGGG  |

Before filtering: read2: quality

Value of each position will be shown on mouse over.

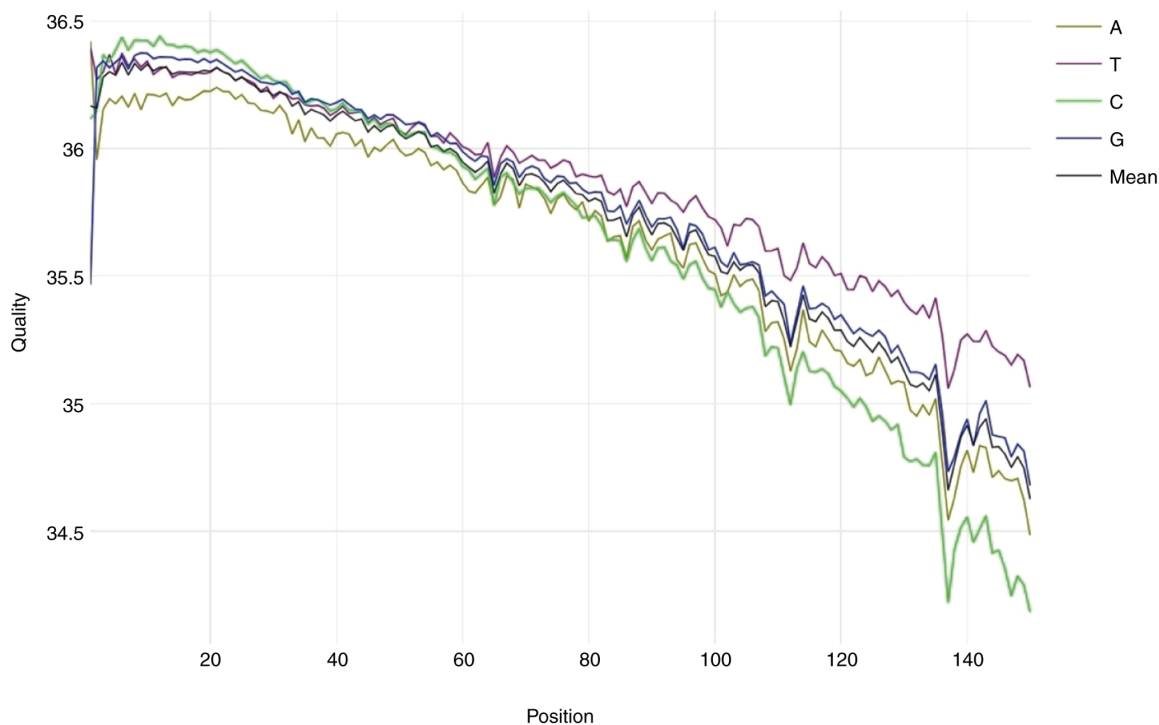

Figure S2. Continued.

Before filtering: read2: base contents  
Value of each position will be shown on mouse over.

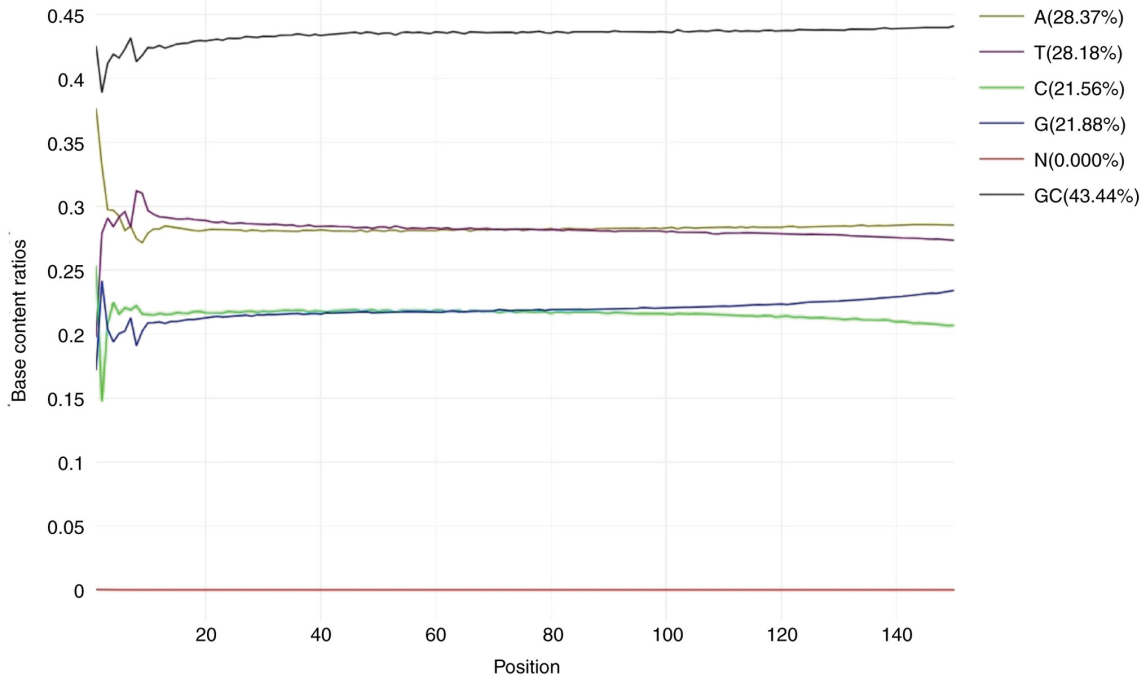

Before filtering: read2: KMER counting  
Darker background means larger counts. The count will be shown on mouse over.

|     | AA     | AT      | AC     | AG     | TA      | TT      | TC      | TG      | CA      | CT      | CC      | CG      | GA      | GT       | GC       | GG       |
|-----|--------|---------|--------|--------|---------|---------|---------|---------|---------|---------|---------|---------|---------|----------|----------|----------|
| AAA | AAAA   | AAAAT   | AAAAC  | AAANG  | AAATA   | AAATT   | AAATC   | AAATG   | AAACA   | AAACT   | AAACC   | AAACG   | AAAGA   | AAAGT    | AAAGC    | AAAGG    |
| AAI | AAATA  | AAATAT  | AAATAC | AAATAG | AAATTA  | AAATTT  | AAATTC  | AAATTG  | AAATCA  | AAATCT  | AAATCC  | AAATCG  | AAATGA  | AAATGT   | AAATGC   | AAATGG   |
| AAC | AACAA  | AACAAT  | AACAC  | AACAG  | AACATA  | AACATT  | AACATC  | AACATG  | AACACA  | AACACT  | AACACC  | AACACG  | AACAGA  | AACAGT   | AACAGC   | AACAGG   |
| AAG | AAGAA  | AAGAAT  | AAGAC  | AAGAG  | AAGATA  | AAGATT  | AAGATC  | AAGATG  | AAGACA  | AAGACT  | AAAGCC  | AAAGCG  | AAAGGA  | AAAGGT   | AAAGGC   | AAAGGG   |
| ATA | ATAAA  | ATAAAT  | ATAAC  | ATAAG  | ATAATA  | ATAATT  | ATAATC  | ATAATG  | ATAACA  | ATAACT  | ATAACC  | ATAACG  | ATAAGA  | ATAAGT   | ATAAGC   | ATAAGG   |
| ATT | ATTAA  | ATTAAAT | ATTAC  | ATTAG  | ATTATA  | ATTATT  | ATTATC  | ATTATG  | ATTACA  | ATTACT  | ATTACC  | ATTACG  | ATTAGA  | ATTAGT   | ATTAGC   | ATTAGG   |
| ATC | ATCAA  | ATCAAT  | ATCAC  | ATCAG  | ATCATA  | ATCATT  | ATCATC  | ATCATG  | ATCACA  | ATCACT  | ATCACC  | ATCACG  | ATCAGA  | ATCAGT   | ATCAGC   | ATCAGG   |
| ATG | ATGAA  | ATGAAT  | ATGAC  | ATGAG  | ATGATA  | ATGATT  | ATGATC  | ATGATG  | ATGACA  | ATGACT  | ATGACC  | ATGACG  | ATGAGA  | ATGAGT   | ATGAGC   | ATGAGG   |
| ACA | ACAAA  | ACAAAT  | ACAAC  | ACAAG  | ACATA   | ACATT   | ACATC   | ACATG   | ACACA   | ACACT   | ACACC   | ACACG   | ACAGA   | ACAGT    | ACAGC    | ACAGG    |
| ACT | ACTAA  | ACTAAT  | ACTAC  | ACTAG  | ACTATA  | ACTATT  | ACTATC  | ACTATG  | ACTACA  | ACTACT  | ACTACC  | ACTACG  | ACTAGA  | ACTAGT   | ACTAGC   | ACTAGG   |
| ACC | ACCAA  | ACCAAT  | ACCAC  | ACCAG  | ACCTA   | ACCTT   | ACCTC   | ACCTG   | ACCCA   | ACCCCT  | ACCCCC  | ACCCCG  | ACCGA   | ACCGT    | ACCGC    | ACCGG    |
| ACG | ACGAA  | ACGAAT  | ACGAC  | ACGAG  | ACGATA  | ACGATT  | ACGATC  | ACGATG  | ACGACA  | ACGACT  | ACGACC  | ACGACG  | ACGAGA  | ACGAGT   | ACGAGC   | ACGAGG   |
| AGA | AGAAA  | AGAAAT  | AGAAC  | AGAG   | AGATA   | AGATT   | AGATC   | AGATG   | AGACA   | AGACT   | AGACC   | AGACG   | AGAGA   | AGAGT    | AGAGC    | AGAGG    |
| AGT | AGTAA  | AGTAAAT | AGTAC  | AGTAG  | AGTATA  | AGTATT  | AGTATC  | AGTATG  | AGTACA  | AGTACT  | AGTACC  | AGTACG  | AGTAGA  | AGTAGT   | AGTAGC   | AGTAGG   |
| AGC | AGCAA  | AGCAAT  | AGCAC  | AGCAG  | AGCTA   | AGCTT   | AGCTC   | AGCTG   | AGCCA   | AGCCCT  | AGCCCC  | AGCCCG  | AGCGA   | AGCGT    | AGCGC    | AGCGG    |
| AGG | AGGAA  | AGGAAT  | AGGAC  | AGGAG  | AGGATA  | AGGATT  | AGGATC  | AGGATG  | AGGACA  | AGGACT  | AGGACC  | AGGACG  | AGGAGA  | AGGAGT   | AGGAGC   | AGGAGG   |
| TAA | TAAAA  | TAAAAT  | TAAAC  | TAAAG  | TAAATA  | TAAATT  | TAAATC  | TAAATG  | TAAACA  | TAAACT  | TAAACC  | TAAACG  | TAAAGA  | TAAAGT   | TAAAGC   | TAAAGG   |
| TAT | TATAA  | TATAAT  | TATAC  | TATAG  | TATATA  | TATATT  | TATATC  | TATATG  | TATACA  | TATACT  | TATACC  | TATACG  | TATAGA  | TATAGT   | TATAGC   | TATAGG   |
| TAC | TACAA  | TACAAT  | TACAC  | TACAG  | TACTA   | TACTT   | TACTC   | TACTG   | TACCA   | TACCT   | TACCC   | TACCCG  | TACCGA  | TACCGT   | TACCGC   | TACCGG   |
| TAG | TAGAA  | TAGAAAT | TAGAC  | TAGAG  | TAGATA  | TAGATT  | TAGATC  | TAGATG  | TAGACA  | TAGACT  | TAGACC  | TAGACG  | TAGAGA  | TAGAGT   | TAGAGC   | TAGAGG   |
| TAA | TAAAA  | TAAAAT  | TAAAC  | TAAAG  | TAAATA  | TAAATT  | TAAATC  | TAAATG  | TAAACA  | TAAACT  | TAAACC  | TAAACG  | TAAAGA  | TAAAGT   | TAAAGC   | TAAAGG   |
| TAT | TATAA  | TATAAT  | TATAC  | TATAG  | TATATA  | TATATT  | TATATC  | TATATG  | TATACA  | TATACT  | TATACC  | TATACG  | TATAGA  | TATAGT   | TATAGC   | TATAGG   |
| TAC | TACAA  | TACAAT  | TACAC  | TACAG  | TACTA   | TACTT   | TACTC   | TACTG   | TACCA   | TACCT   | TACCC   | TACCCG  | TACCGA  | TACCGT   | TACCGC   | TACCGG   |
| TAG | TAGAA  | TAGAAAT | TAGAC  | TAGAG  | TAGATA  | TAGATT  | TAGATC  | TAGATG  | TAGACA  | TAGACT  | TAGACC  | TAGACG  | TAGAGA  | TAGAGT   | TAGAGC   | TAGAGG   |
| TAA | TAAAA  | TAAAAT  | TAAAC  | TAAAG  | TAAATA  | TAAATT  | TAAATC  | TAAATG  | TAAACA  | TAAACT  | TAAACC  | TAAACG  | TAAAGA  | TAAAGT   | TAAAGC   | TAAAGG   |
| TAT | TATAA  | TATAAT  | TATAC  | TATAG  | TATATA  | TATATT  | TATATC  | TATATG  | TATACA  | TATACT  | TATACC  | TATACG  | TATAGA  | TATAGT   | TATAGC   | TATAGG   |
| TTC | TTCAA  | TTCAAT  | TTCAC  | TTCAG  | TTCATA  | TTCATT  | TTCATC  | TTCATG  | TTCACA  | TTCACT  | TTCACC  | TTCACG  | TTCAGA  | TTCAGT   | TTCAGC   | TTCAGG   |
| TTG | TTGAA  | TTGAAAT | TTGAC  | TTGAG  | TTGATA  | TTGATT  | TTGATC  | TTGATG  | TTGACA  | TTGACT  | TTGACC  | TTGACG  | TTGAGA  | TTGAGT   | TTGAGC   | TTGAGG   |
| TCA | TCAAA  | TCAAAT  | TCAAC  | TCAAG  | TCATA   | TCAATT  | TCAATC  | TCAATG  | TCACA   | TCACT   | TCACC   | TCACCG  | TCCGA   | TCCGT    | TCCGC    | TCCGG    |
| TCT | TCTAA  | TCTAAT  | TCTAC  | TCTAG  | TCTATA  | TCTATT  | TCTATC  | TCTATG  | TCTACA  | TCTACT  | TCTACC  | TCTACG  | TCTAGA  | TCTAGT   | TCTAGC   | TCTAGG   |
| TCC | TCCAA  | TCCAAT  | TCCAC  | TCCAG  | TCCATA  | TCCATT  | TCCATC  | TCCATG  | TCCACA  | TCCACT  | TCCACC  | TCCACG  | TCCAGA  | TCCAGT   | TCCAGC   | TCCAGG   |
| TCC | TCCAA  | TCCAAT  | TCCAC  | TCCAG  | TCCATA  | TCCATT  | TCCATC  | TCCATG  | TCCACA  | TCCACT  | TCCACC  | TCCACG  | TCCAGA  | TCCAGT   | TCCAGC   | TCCAGG   |
| TGA | TGAAA  | TGAAAT  | TGAAC  | TGAG   | TGATA   | TGATT   | TGATC   | TGATG   | TGACA   | TGACT   | TGACC   | TGACG   | TGAGA   | TGAGT    | TGAGC    | TGAGG    |
| TGT | TGTAA  | TGTAAAT | TGTAC  | TGTAG  | TGTATA  | TGTATT  | TGTATC  | TGTATG  | TGTACA  | TGTACT  | TGTACC  | TGTACG  | TGTAGA  | TGTAGT   | TGTAGC   | TGTAGG   |
| TGC | TGCAA  | TGCAAT  | TGCAC  | TGCAG  | TGCTA   | TGCTT   | TGCTC   | TGCTG   | TGCCA   | TGCCCT  | TGCCCC  | TGCCCG  | TGCCGA  | TGCCGT   | TGCCGC   | TGCCGG   |
| TGG | TGAAA  | TGAAAT  | TGAAC  | TGAG   | TGATA   | TGATT   | TGATC   | TGATG   | TGACA   | TGACT   | TGACC   | TGACG   | TGAGA   | TGAGT    | TGAGC    | TGAGG    |
| CAA | CAAAA  | CAAAAT  | CAAAC  | CAAG   | CAATA   | CAATT   | CAATC   | CAATG   | CAACA   | CAACT   | CAACC   | CAACG   | CAAGA   | CAAGT    | CAAGC    | CAAGG    |
| CAI | CATAA  | CATAAT  | CATAC  | CATAG  | CATATA  | CATATT  | CATATC  | CATATG  | CATACA  | CATACT  | CATACC  | CATACG  | CATAGA  | CATAGT   | CATAGC   | CATAGG   |
| CAC | CACAA  | CACAAT  | CACAC  | CACAG  | CACTA   | CACTT   | CACTC   | CACTG   | CACCA   | CACCT   | CACCC   | CACCCG  | CACCGA  | CACCGT   | CACCGC   | CACCGG   |
| CAG | CAGAA  | CAGAAAT | CAGAC  | CAGAG  | CAGATA  | CAGATT  | CAGATC  | CAGATG  | CAGACA  | CAGACT  | CAGACC  | CAGACG  | CAGAGA  | CAGAGT   | CAGAGC   | CAGAGG   |
| CTA | CTAAA  | CTAAAT  | CTAAC  | CTAG   | CTATA   | CTATT   | CTATC   | CTATG   | CTACA   | CTACT   | CTACC   | CTACG   | CTAGA   | CTAGT    | CTAGC    | CTAGG    |
| CTI | CTTAA  | CTTAAAT | CTTAC  | CTTAG  | CTTATA  | CTTATT  | CTTATC  | CTTATG  | CTTACA  | CTTACT  | CTTACC  | CTTACG  | CTTAGA  | CTTAGT   | CTTAGC   | CTTAGG   |
| CTC | CTCAA  | CTCAAT  | CTCAC  | CTCAG  | CITTA   | CITTT   | CITTC   | CITTG   | CTCCA   | CTCCT   | CTCCC   | CTCCCG  | CTCCGA  | CTCCGT   | CTCCGC   | CTCCGG   |
| CTG | CTGAA  | CTGAAAT | CTGAC  | CTGAG  | CITGTA  | CITGTT  | CITGTC  | CITGTG  | CTGCA   | CTGCT   | CTGCC   | CTGCCG  | CTGCCGA | CTGCCGT  | CTGCCGC  | CTGCCGG  |
| CCA | CCAAA  | CCAAAT  | CCAAC  | CCAG   | CCATA   | CCATT   | CCATC   | CCATG   | CCACA   | CCACT   | CCACC   | CCACG   | CCAGA   | CCAGT    | CCAGC    | CCAGG    |
| CCI | CCTAA  | CCTAAT  | CCTAC  | CCTAG  | CCTATA  | CCTATT  | CCTATC  | CCTATG  | CCTACA  | CCTACT  | CCTACC  | CCTACG  | CCTAGA  | CCTAGT   | CCTAGC   | CCTAGG   |
| CCC | CCCAA  | CCCAAT  | CCCAC  | CCCG   | CCCTA   | CCCTT   | CCCTC   | CCCTG   | CCCCA   | CCCCCT  | CCCCC   | CCCCCG  | CCCCGA  | CCCCGT   | CCCCGC   | CCCCGG   |
| CCG | CCGAA  | CCGAAT  | CCGAC  | CCGAG  | CCGTA   | CCGTT   | CCGTC   | CCGTG   | CCGCA   | CCGCT   | CCGCC   | CCGCCG  | CCGCCGA | CCGCCGT  | CCGCCGC  | CCGCCGG  |
| CGA | CGAAA  | CGAAAT  | CGAAC  | CGAG   | CGATA   | CGATT   | CGATC   | CGATG   | CGACA   | CGACT   | CGACC   | CGACG   | CGAGA   | CGAGT    | CGAGC    | CGAGG    |
| CGI | CGTAA  | CGTAAAT | CGTAC  | CGTAG  | CGTATA  | CGTATT  | CGTATC  | CGTATG  | CGTACA  | CGTACT  | CGTACC  | CGTACG  | CGTAGA  | CGTAGT   | CGTAGC   | CGTAGG   |
| CGC | CGCAA  | CGCAAT  | CGCAC  | CGCAG  | CGCTA   | CGCTT   | CGCTC   | CGCTG   | CGCCA   | CGCCT   | CGCCC   | CGCCCG  | CGCCGA  | CGCCGT   | CGCCGC   | CGCCGG   |
| CGG | CGGAA  | CGGAAAT | CGGAC  | CGGAG  | CGGTA   | CGGTT   | CGGTC   | CGGTG   | CGGCA   | CGGCT   | CGGCC   | CGGCCG  | CGGCCGA | CGGCCGT  | CGGCCGC  | CGGCCGG  |
| GAA | GAAAA  | GAAAAT  | GAAAC  | GAAAG  | GAAATA  | GAAATT  | GAAATC  | GAAATG  | GAAACA  | GAAACT  | GAAACC  | GAAACG  | GAAAGA  | GAAAGT   | GAAAGC   | GAAAGG   |
| GAI | GATAA  | GATAAT  | GATAC  | GATAG  | GATATA  | GATATT  | GATATC  | GATATG  | GATACA  | GATACT  | GATACC  | GATACG  | GATAGA  | GATAGT   | GATAGC   | GATAGG   |
| GAC | GACAA  | GACAAT  | GACAC  | GACAG  | GACTA   | GACTT   | GACTC   | GACTG   | GACCA   | GACCT   | GACCC   | GACCCG  | GACCGA  | GACCGT   | GACCGC   | GACCGG   |
| GAG | GAGAA  | GAGAAAT | GAGAC  | GAGAG  | GAGATA  | GAGATT  | GAGATC  | GAGATG  | GAGACA  | GAGACT  | GAGACC  | GAGACG  | GAGAGA  | GAGAGT   | GAGAGC   | GAGAGG   |
| GTA | GTA AA | GTA AAT | GTA AC | GTA AG | GTA ATA | GTA ATT | GTA ATC | GTA ATG | GTA ACA | GTA ACT | GTA ACC | GTA ACG | GTA AGA | GTA AGT  | GTA AGC  | GTA AGG  |
| GTT | GTTAA  | GTTAAAT | GTTAC  | GTTAG  | GTTATA  | GTTATT  | GTTATC  | GTTATG  | GTTACA  | GTTACT  | GTTACC  | GTTACG  | GTTAGA  | GTTAGT   | GTTAGC   | GTTAGG   |
| GTC | GTCAA  | GTCAAT  | GTCAC  | GTCAG  | GICTA   | GICTT   | GICTC   | GICTG   | GITCA   | GICTT   | GITCC   | GITCCG  | GITCGA  | GITCGT   | GITCGC   | GITCGG   |
| GTG | GTGAA  | GTGAAAT | GTGAC  | GTGAG  | GITGTA  | GITGTT  | GITGTC  | GITGTG  | GITGA   | GITGT   | GITGC   | GITGCC  | GITGCCA | GITGCCGT | GITGCCGC | GITGCCGG |
| GCA | GCAAA  | GCAAAT  | GCAAC  | GCAAG  | GCAATA  | GCAATT  | GCAATC  | GCAATG  | GCAACA  | GCAACT  | GCAACC  | GCAACG  | GCAAGA  | GCAAGT   | GCAAGC   | GCAAGG   |
| GCT | GCTAA  | GCTAAT  | GCTAC  | GCTAG  | GCTATA  | GCTATT  | GCTATC  | GCTATG  | GCTACA  | GCTACT  | GCTACC  | GCTACG  | GCTAGA  | GCTAGT   | GCTAGC   | GCTAGG   |
| GCC | GCCAA  | GCCAAT  | GCCAC  | GCCAG  | GCCTA   | GCCTT   | GCCTC   | GCCTG   | GCCCA   | GCCCT   | GCCCC   | GCCCCG  | GCCCGA  | GCCCGT   | GCCCGC   | GCCCGG   |
| GCG | GCGAA  | GCGAAT  | GCGAC  | GCGAG  | GCGTA   | GCGTT   | GCGTC   | GCGTG   | GCGCA   | GCGCT   | GCGCC   | GCGCCG  | GCGCCGA | GCGCCGT  | GCGCCGC  | GCGCCGG  |
| GGA | GGA AA | GGA AAT | GGA AC | GGA AG | GGA ATA | GGA ATT | GGA ATC | GGA ATG | GGA ACA | GGA ACT | GGA ACC | GGA ACG | GGA AGA | GGA AGT  | GGA AGC  | GGA AGG  |
| GGI | GGTAA  | GGTAAAT | GGTAC  | GGTAG  | GGTATA  | GGTATT  | GGTATC  | GGTATG  | GGTACA  | GGTACT  | GGTACC  | GGTACG  | GGTAGA  | GGTAGT   | GGTAGC   | GGTAGG   |
| GGC | GCCAA  | GCCAAT  | GCCAC  | GCCAG  | GGCTA   | GGCTT   | GGCTC   | GGCTG   | GGCCA   | GGCCT   | GGCCC   | GGCCCG  | GGCCGA  | GGCCGT   | GGCCGC   | GGCCGG   |
| GGG | GGGAA  | GGGAAAT | GGGAC  | GGGAG  | GGGTA   | GGGTT   | GGGTC   | GGGTG   | GGGCA   | GGGCT   | GGGCC   | GGGCCG  | GGGCCGA | GGGCCGT  | GGGCCGC  | GGGCCGG  |

Figure S2. Continued.

### After filtering

#### After filtering: read1: quality

Value of each position will be shown on mouse over.

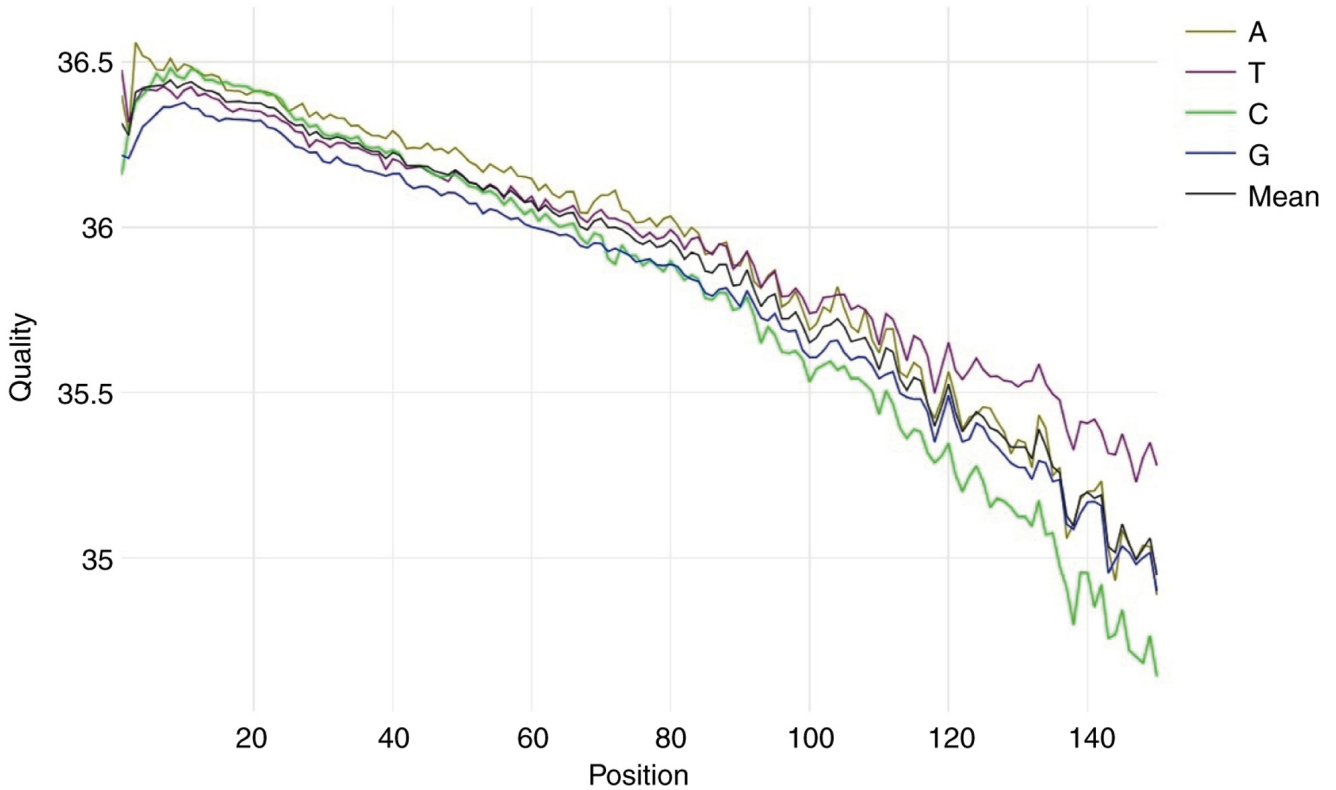

#### After filtering: read1: base contents

Value of each position will be shown on mouse over.

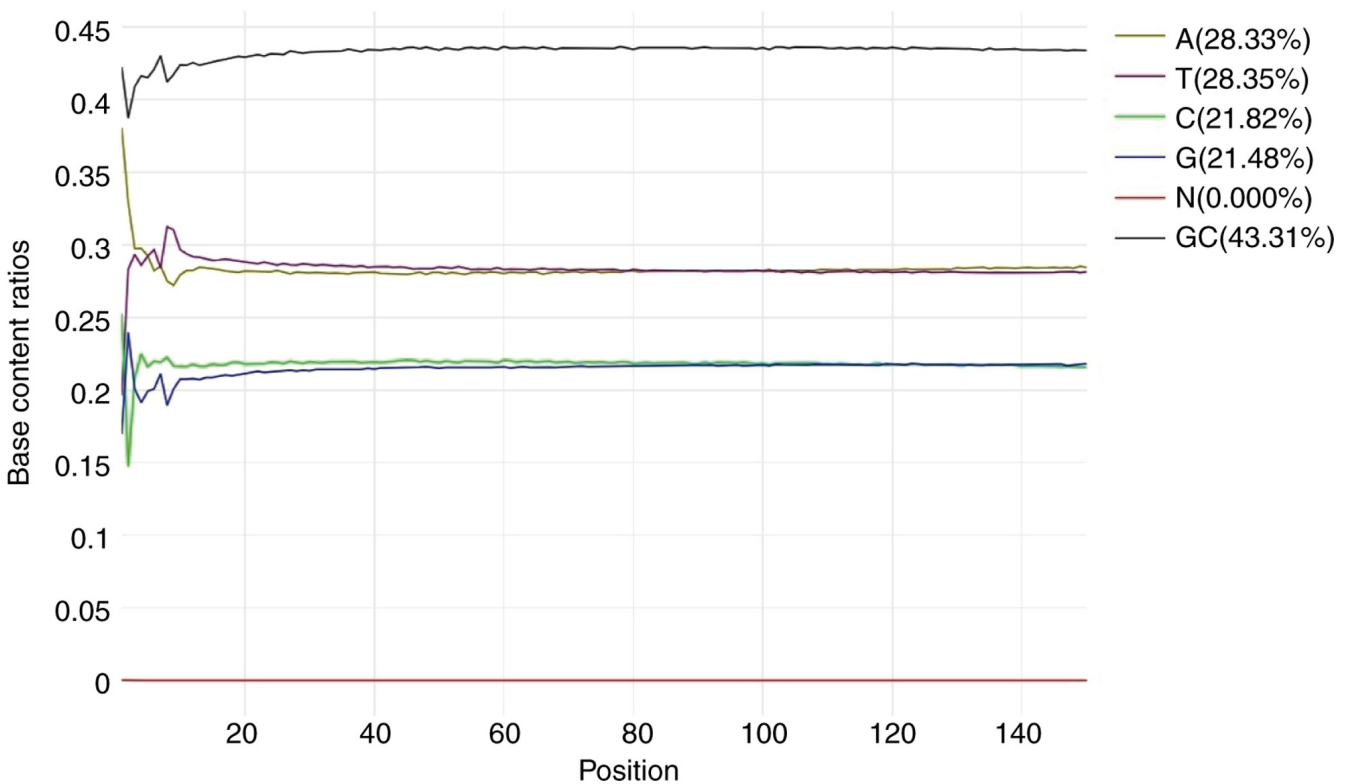

Figure S2. Continued.

After filtering: read1: KMER counting

Darker background means larger counts. The count will be shown on mouse over.

|      | AA    | AT    | AC    | AG    | TA     | TT     | TC     | TS     | CA     | CT     | CC     | CG     | GA     | GT     | GC     | GG     |
|------|-------|-------|-------|-------|--------|--------|--------|--------|--------|--------|--------|--------|--------|--------|--------|--------|
| AAA  | AAAA  | AAAT  | AAAC  | AAAG  | AAATA  | AAATT  | AAATC  | AAATG  | AAACA  | AAACT  | AAACC  | AAACG  | AAAGA  | AAAGT  | AAAGC  | AAAGG  |
| AAT  | AAATA | AAAT  | AAATC | AAATG | AAATA  | AAATT  | AAATC  | AAATG  | AAATA  | AAACT  | AAACC  | AAACG  | AAAGA  | AAAGT  | AAAGC  | AAAGG  |
| AAC  | AAACA | AACAT | AACAC | AACAG | AACATA | AACATT | AACTC  | AACTG  | AACCA  | AACCT  | AACCC  | AACCG  | AACGA  | AACGT  | AACGC  | AACGG  |
| AAG  | AAAGA | AAGAT | AAGAC | AAGAG | AAGATA | AAGATT | AAGTC  | AAGTG  | AAGCA  | AAGCT  | AAGCC  | AAGCG  | AAGGA  | AAGGT  | AAGGC  | AAGGG  |
| ATA  | ATAAA | ATAAT | ATAAC | ATAAG | ATAATA | ATAATT | ATAATC | ATAATG | ATAACA | ATAACT | ATAACC | ATAACG | ATAAGA | ATAAGT | ATAAGC | ATAAGG |
| ATT  | ATATA | ATAT  | ATATC | ATATG | ATATA  | ATATT  | ATATC  | ATATG  | ATATA  | ATACT  | ATACC  | ATACG  | ATAGA  | ATAGT  | ATAGC  | ATAGG  |
| ATC  | ATCAA | ATCAT | ATCAC | ATCAG | ATCTA  | ATCTT  | ATCTC  | ATCTG  | ATCCA  | ATCCT  | ATCCC  | ATCCG  | ATCGA  | ATCGT  | ATCGC  | ATCCG  |
| ATG  | ATGAA | ATGAT | ATGAC | ATGAG | ATGATA | ATGATT | ATGTC  | ATGTG  | ATGCA  | ATGCT  | ATGCC  | ATGGG  | ATGGA  | ATGGT  | ATGGC  | ATGGG  |
| ACA  | ACAAA | ACAAT | ACAAC | ACAAG | ACAATA | ACAATT | ACAATC | ACAATG | ACAACA | ACAAC  | ACAAC  | ACAACG | ACAAGA | ACAAGT | ACAAGC | ACAAGG |
| ACT  | ACTAA | ACTAT | ACTAC | ACTAG | ACTATA | ACTATT | ACTTC  | ACTTG  | ACTCA  | ACTCT  | ACTCC  | ACTCG  | ACTGA  | ACTGT  | ACTGC  | ACTGG  |
| ACC  | ACCAA | ACCAT | ACCAC | ACCAG | ACCTA  | ACCTT  | ACCTC  | ACCTG  | ACCCA  | ACCTT  | ACCCC  | ACCCG  | ACCGA  | ACCGT  | ACCGC  | ACCCG  |
| ACG  | ACGAA | ACGAT | ACGAC | ACGAG | ACGATA | ACGATT | ACGTC  | ACGTG  | ACGCA  | ACGCT  | ACGCC  | ACGGG  | ACGGA  | ACGGT  | ACGGC  | ACGGG  |
| AGA  | AGAAA | AGAA  | AGAAC | AGAAG | AGATA  | AGATT  | AGATC  | AGATG  | AGACA  | AGACT  | AGACC  | AGACG  | AGAGA  | AGAGT  | AGAGC  | AGAGG  |
| AGT  | AGTAA | AGTAT | AGTAC | AGTAG | AGTATA | AGTATT | AGTTC  | AGTTG  | AGTCA  | AGTCT  | AGTCC  | AGTCG  | AGTGA  | AGTGT  | AGTGC  | AGTGG  |
| AGC  | AGCAA | AGCAT | AGCAC | AGCAG | AGCTA  | AGCTT  | AGCTC  | AGCTG  | AGCCA  | AGCCT  | AGCCC  | AGCCG  | AGCGA  | AGCGT  | AGCGC  | AGCCG  |
| AGG  | AGGAA | AGGAT | AGGAC | AGGAG | AGGATA | AGGATT | AGGTC  | AGGTG  | AGGCA  | AGGCT  | AGGCC  | AGGGG  | AGGGA  | AGGGT  | AGGGC  | AGGGG  |
| TAA  | TAAAA | TAAAT | TAAAC | TAAAG | TAAATA | TAAATT | TAAATC | TAAATG | TAAACA | TAAACT | TAAACC | TAAACG | TAAAGA | TAAAGT | TAAAGC | TAAAGG |
| TAT  | TATAA | TATAT | TATAC | TATAG | TATATA | TATATT | TATATC | TATATG | TATACA | TATCT  | TATCC  | TATCG  | TATGA  | TATGT  | TATGC  | TATGG  |
| TAC  | TACAA | TACAT | TACAC | TACAG | TACATA | TACATT | TACTC  | TACTG  | TACCA  | TACCT  | TACCC  | TACCG  | TACGA  | TACGT  | TACGC  | TACGG  |
| TAG  | TAGAA | TAGAT | TAGAC | TAGAG | TAGATA | TAGATT | TAGTC  | TAGTG  | TAGCA  | TAGCT  | TAGCC  | TAGCG  | TAGGA  | TAGGT  | TAGGC  | TAGGG  |
| TTA  | TTAAA | TTAAT | TTAAC | TTAAG | TTATA  | TTATT  | TTATC  | TTATG  | TTACA  | TTACT  | TTACC  | TTACG  | TTAGA  | TTAGT  | TTAGC  | TTAGG  |
| TTT  | TTTAA | TTTAT | TTTAC | TTTAG | TTTATA | TTTATT | TTTTC  | TTTTG  | TTTCA  | TTTCT  | TTTCC  | TTTCG  | TTTGA  | TTTGT  | TTTGC  | TTTGG  |
| TTG  | TTGAA | TTGAT | TTGAC | TTGAG | TTGATA | TTGATT | TTGTC  | TTGTG  | TTGCA  | TTGCT  | TTGCC  | TTGGG  | TTGGA  | TTGGT  | TTGGC  | TTGGG  |
| TCA  | TCAAA | TCAAT | TCAAC | TCAAG | TCAATA | TCAATT | TCAATC | TCAATG | TCAACA | TCAACT | TCAACC | TCAACG | TCAAGA | TCAAGT | TCAAGC | TCAAGG |
| TCT  | TCTAA | TCTAT | TCTAC | TCTAG | TCTATA | TCTATT | TCTTC  | TCTTG  | TCTCA  | TCTCT  | TCTCC  | TCTCG  | TCTGA  | TCTGT  | TCTGC  | TCTGG  |
| TCC  | TCCAA | TCCAT | TCCAC | TCCAG | TCCATA | TCCATT | TCCTC  | TCCTG  | TCCCA  | TCCCT  | TCCCC  | TCCCG  | TCCGA  | TCCGT  | TCCGC  | TCCGG  |
| TCCG | TCCGA | TCCAT | TCCAC | TCCAG | TCCATA | TCCATT | TCCTC  | TCCTG  | TCCCA  | TCCCT  | TCCCC  | TCCCG  | TCCGA  | TCCGT  | TCCGC  | TCCGG  |
| TGA  | TGAAA | TGAAT | TGAAC | TGAAG | TGATA  | TGATT  | TGATC  | TGATG  | TGACA  | TGACT  | TGACC  | TGACG  | TGAGA  | TGAGT  | TGAGC  | TGAGG  |
| TGT  | TGTAA | TGTAT | TGTAC | TGTAG | TGTATA | TGTATT | TGTTC  | TGTTG  | TGTCA  | TGTCT  | TGTCC  | TGTCTG | TGTGA  | TGTGT  | TGTGC  | TGTGG  |
| TGC  | TGCAA | TGCAT | TGCAC | TGCAG | TGCTA  | TGCTT  | TGCTC  | TGCTG  | TGCCA  | TGCTT  | TGCCC  | TGCCG  | TGCGA  | TGCGT  | TGCGC  | TGCCG  |
| TGG  | TGGA  | TGGAT | TGGAC | TGGAG | TGGATA | TGGATT | TGGTC  | TGGTG  | TGGCA  | TGGCT  | TGGCC  | TGGCG  | TGGGA  | TGGGT  | TGGGC  | TGGGG  |
| CAA  | CAAAA | CAAA  | CAAAC | CAAG  | CAATA  | CAATT  | CAATC  | CAATG  | CAACA  | CAACT  | CAACC  | CAACG  | CAAGA  | CAAGT  | CAAGC  | CAAGG  |
| CAT  | CATAA | CATAT | CATAC | CATAG | CATATA | CATATT | CATTC  | CATTG  | CATCA  | CATCT  | CATCC  | CATCG  | CATGA  | CATGT  | CATGC  | CATGG  |
| CAC  | CACAA | CACAT | CACAC | CACAG | CACATA | CACATT | CACTC  | CACTG  | CACCA  | CACCT  | CACCC  | CACCG  | CACGA  | CACGT  | CACGC  | CACGG  |
| CAG  | CAGAA | CAGAT | CAGAC | CAGAG | CAGATA | CAGATT | CAGTC  | CAGTG  | CAGCA  | CAGCT  | CAGCC  | CAGCG  | CAGGA  | CAGGT  | CAGGC  | CAGGG  |
| CCT  | CTAAA | CTAAT | CTAAC | CTAAG | CTATA  | CTATT  | CTATC  | CTATG  | CTACA  | CTACT  | CTACC  | CTACG  | CTAGA  | CTAGT  | CTAGC  | CTAGG  |
| CTA  | CTTAA | CTTAT | CTTAC | CTTAG | CTTATA | CTTATT | CTTTC  | CTTTG  | CTTCA  | CTTCT  | CTTCC  | CTTCG  | CTTGA  | CTTGT  | CTTGC  | CTTGG  |
| CTC  | CTGAA | CTGAT | CTGAC | CTGAG | CTGATA | CTGATT | CTGTC  | CTGTG  | CTGCA  | CTGCT  | CTGCC  | CTGGG  | CTGGA  | CTGGT  | CTGGC  | CTGGG  |
| CTG  | CTGAA | CTGAT | CTGAC | CTGAG | CTGATA | CTGATT | CTGTC  | CTGTG  | CTGCA  | CTGCT  | CTGCC  | CTGGG  | CTGGA  | CTGGT  | CTGGC  | CTGGG  |
| CCA  | CCAAA | CCAA  | CCAAC | CCAAG | CCATA  | CCATT  | CCATC  | CCATG  | CCACA  | CCAAT  | CCACC  | CCACG  | CCAGA  | CCAGT  | CCAGC  | CCAGG  |
| CCT  | CCTAA | CCTAT | CCTAC | CCTAG | CCTATA | CCTATT | CCTTC  | CCTTG  | CCTCA  | CCTCT  | CCTCC  | CCTCG  | CCTGA  | CCTGT  | CCTGC  | CCTGG  |
| CCC  | CCCAA | CCCAT | CCCAC | CCCAG | CCCTA  | CCCTT  | CCCTC  | CCCTG  | CCCCA  | CCCTT  | CCCCC  | CCCCG  | CCCGA  | CCCGT  | CCCGC  | CCCCG  |
| CCG  | CCGAA | CCGAT | CCGAC | CCGAG | CCGATA | CCGATT | CCGTC  | CCGTG  | CCGCA  | CCGCT  | CCGCC  | CCGGG  | CCGGA  | CCGGT  | CCGGC  | CCGGG  |
| CGA  | CGAAA | CGAAT | CGAAC | CGAAG | CGATA  | CGATT  | CGATC  | CGATG  | CGACA  | CGACT  | CGACC  | CGACG  | CGAGA  | CGAGT  | CGAGC  | CGAGG  |
| CGT  | CGTAA | CGTAT | CGTAC | CGTAG | CGTATA | CGTATT | CGTTC  | CGTTG  | CGTCA  | CGTCT  | CGTCC  | CGTCG  | CGTGA  | CGTGT  | CGTGC  | CGTGG  |
| CGC  | CGCAA | CGCAT | CGCAC | CGCAG | CGCTA  | CGCTT  | CGCTC  | CGCTG  | CGCCA  | CGCCT  | CGCCC  | CGCCG  | CGCGA  | CGCGT  | CGCGC  | CGCCG  |
| CGG  | CGGAA | CGGAT | CGGAC | CGGAG | CGGATA | CGGATT | CGGTC  | CGGTG  | CGGCA  | CGGCT  | CGGCC  | CGGGG  | CGGGA  | CGGGT  | CGGGC  | CGGGG  |
| GAA  | GAAAA | GAAAT | GAAAC | GAAAG | GAAATA | GAAATT | GAAATC | GAAATG | GAAACA | GAAACT | GAAACC | GAAACG | GAAAGA | GAAAGT | GAAAGC | GAAAGG |
| GA   | GATAA | GATAT | GATAC | GATAG | GATATA | GATATT | GATTC  | GATTG  | GATCA  | GATCT  | GATCC  | GATCG  | GATGA  | GATGT  | GATGC  | GATGG  |
| GAC  | GACAA | GACAT | GACAC | GACAG | GACATA | GACATT | GACTC  | GACTG  | GACCA  | GACCT  | GACCC  | GACCG  | GACGA  | GACGT  | GACGC  | GACGG  |
| GAG  | GAGAA | GAGAT | GAGAC | GAGAG | GAGATA | GAGATT | GAGTC  | GAGTG  | GAGCA  | GAGCT  | GAGCC  | GAGCG  | GAGGA  | GAGGT  | GAGGC  | GAGGG  |
| GTA  | GTA   | GTAAT | GTAAC | GTAAG | GTAATA | GTAATT | GTAATC | GTAATG | GTAACA | GTAACT | GTAACC | GTAACG | GTAAGA | GTAAGT | GTAAGC | GTAAGG |
| GTT  | GTTAA | GTTAT | GTTAC | GTTAG | GTTATA | GTTATT | GTTTC  | GTTTG  | GTTCA  | GTTCT  | GTTCC  | GTTCTG | GTTGA  | GTTGT  | GTTGC  | GTTGG  |
| GTC  | GTC   | GTCAT | GTCAC | GTCAG | GTCATA | GTCATT | GTCTC  | GTC    | GTC    | GTCCT  | GTC    | GTC    | GTC    | GTC    | GTC    | GTC    |
| GTG  | GTGAA | GTGAT | GTGAC | GTGAG | GTGATA | GTGATT | GTGTC  | GTGTG  | GTGCA  | GTGCT  | GTGCC  | GTGGG  | GTGGA  | GTGGT  | GTGGC  | GTGGG  |
| GTA  | GTAAA | GTAAT | GTAAC | GTAAG | GTAATA | GTAATT | GTAATC | GTAATG | GTAACA | GTAACT | GTAACC | GTAACG | GTAAGA | GTAAGT | GTAAGC | GTAAGG |
| GCT  | GCTAA | GCTAT | GCTAC | GCTAG | GCTATA | GCTATT | GCTTC  | GCTTG  | GCTCA  | GCTCT  | GCTCC  | GCTCG  | GCTGA  | GCTGT  | GCTGC  | GCTGG  |
| GCC  | GCCAA | GCCAT | GCCAC | GCCAG | GCCATA | GCCATT | GCCTC  | GCCTG  | GCCCA  | GCCCT  | GCCCC  | GCCCG  | GCCGA  | GCCGT  | GCCGC  | GCCGG  |
| GCG  | GCGAA | GCGAT | GCGAC | GCGAG | GCGATA | GCGATT | GCGTC  | GCGTG  | GCGCA  | GCGCT  | GCGCC  | GCGCG  | GCGGA  | GCGGT  | GCGGC  | GCGGG  |
| GGA  | GGAAA | GGAA  | GGAAC | GGAAG | GGATA  | GGATT  | GGATC  | GGATG  | GGACA  | GGACT  | GGACC  | GGACG  | GGAGA  | GGAGT  | GGAGC  | GGAGG  |
| GGT  | GGTAA | GGTAT | GGTAC | GGTAG | GGTATA | GGTATT | GGTTC  | GGTTG  | GGTCA  | GGTCT  | GGTCC  | GGTCG  | GGTGA  | GGTGT  | GGTGC  | GGTGG  |
| GGC  | GSCAA | GSCAT | GSCAC | GSCAG | GSCATA | GSCATT | GSCTC  | GSCTG  | GSCCA  | GSCCT  | GSCCC  | GSCCG  | GSCGA  | GSCGT  | GSCGC  | GSCGG  |
| GGG  | GSGAA | GSGAT | GSGAC | GSGAG | GSGATA | GSGATT | GSGTC  | GSGTG  | GSGCA  | GSGCT  | GSGCC  | GSGCG  | GSGGA  | GSGGT  | GSGGC  | GSGGG  |

After filtering: read2: quality

Value of each position will be shown on mouse over.

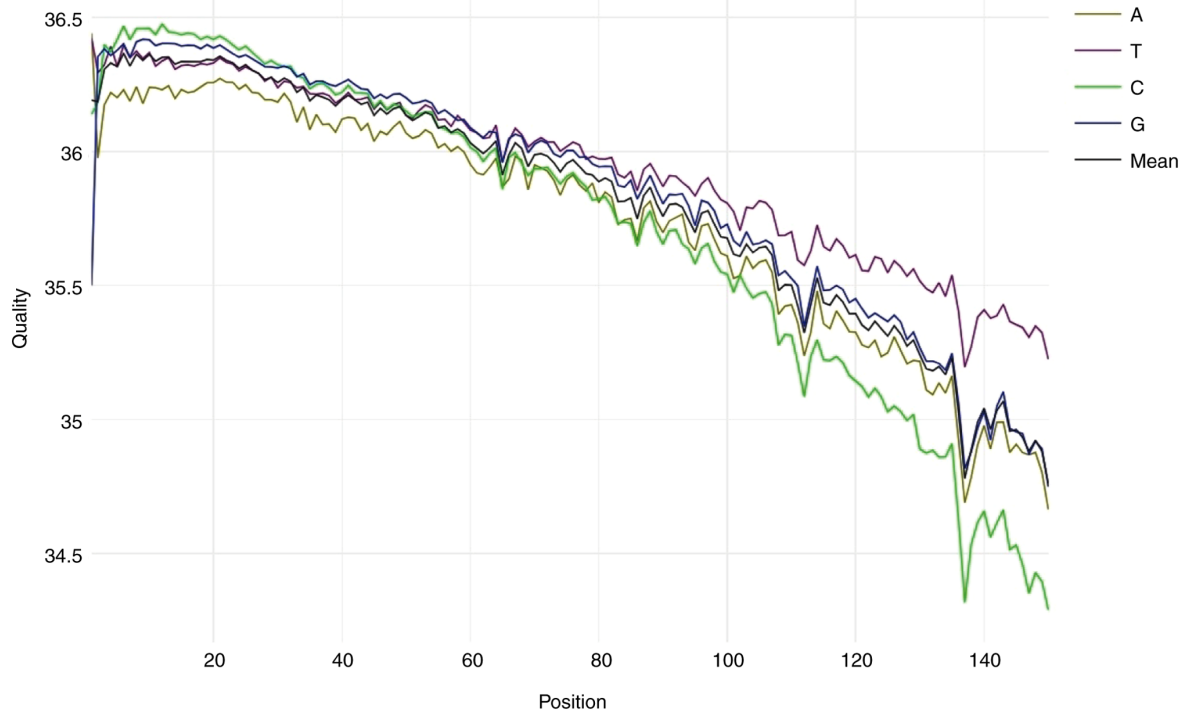



Figure S3. Positive immunohistochemistry results of the rectal specimen. Positive expression for (A) DNA mismatch repair protein Mlh1, (B) DNA mismatch repair protein Msh2, (C) DNA mismatch repair protein Msh6 and (D) mismatch repair endonuclease PMS2.

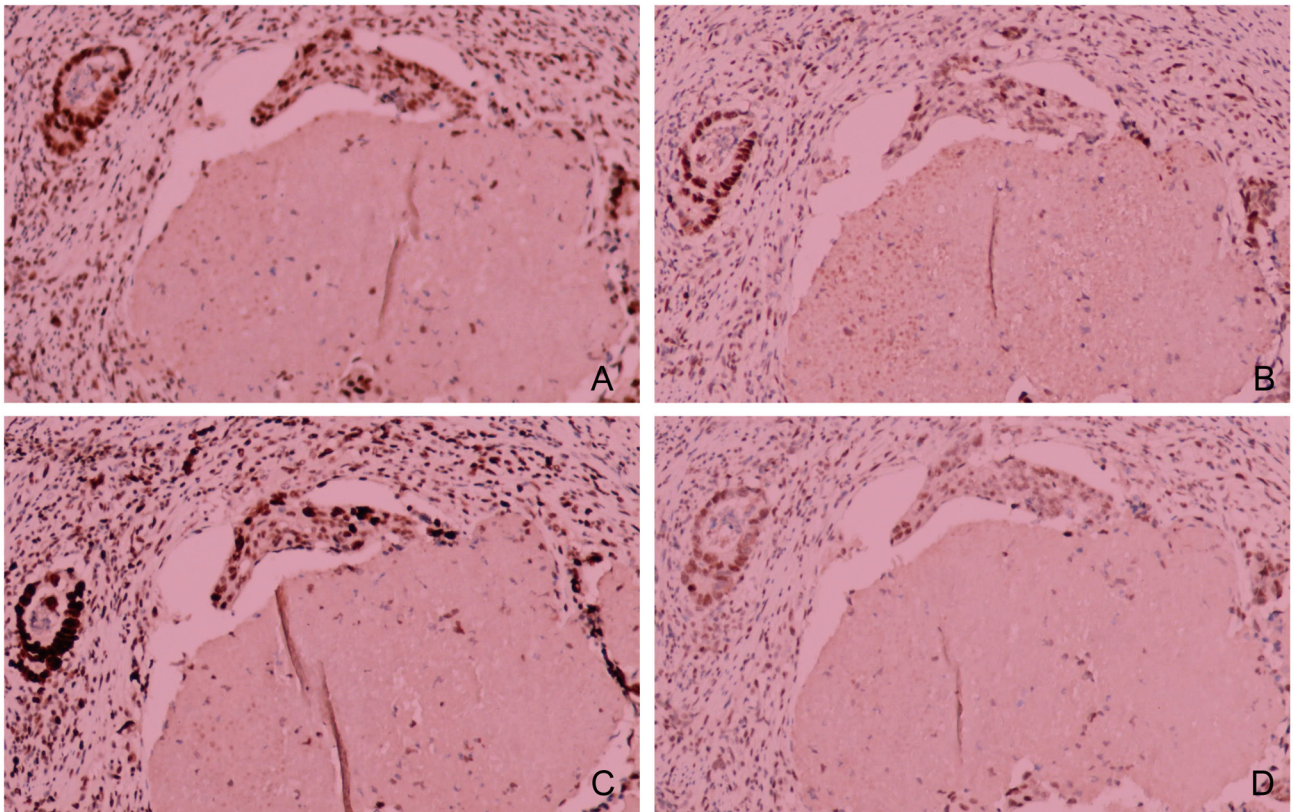

Supplement: Supplementary file 1 [file downloadSupplementary]
